# Supplementary material for: Multi-omics analysis reveals substantial linkages between the oral-gut microbiomes and inflamm-aging molecules in elderly pigs
Source: Front Microbiol. 2023 Sep 15;14:1250891. doi: 10.3389/fmicb.2023.1250891 (PMC10542583; doi:10.3389/fmicb.2023.1250891)
Supplement: Supplementary file 3 [file Data_Sheet_3.xlsx]

## Sheet: Table S18
Supplementary Table 18. Associations between significantly different gut microbes and metabolites in Ad and Oa groups
Microbial species	Metabolites	Correlation coefficients	Corrected P-values
s__Eubacterium sp. CAG:180	Fenpropidin	0.619549	0.0388235
s__Ruminococcus albus	Fenpropidin	0.637594	0.036408
s__Cellulosilyticum ruminicola	Pyridaben	-0.664662	0.0293795
s__Collinsella aerofaciens	16-hydroxyhexadecanoic acid	0.666165	0.02899
s__Bacteroides fragilis	16-hydroxyhexadecanoic acid	0.604511	0.0424983
s__Bacteroides plebeius CAG:211	16-hydroxyhexadecanoic acid	0.718797	0.0223994
s__Enterococcus cecorum	16-hydroxyhexadecanoic acid	0.804511	0.0111429
s__Oscillibacter sp. 1-3	16-hydroxyhexadecanoic acid	-0.634586	0.0366021
s__Oscillibacter sp. 57_20	16-hydroxyhexadecanoic acid	-0.616541	0.039373
s__Oscillibacter sp. CAG:155	16-hydroxyhexadecanoic acid	-0.649624	0.0328207
s__Oscillibacter sp. PC13	16-hydroxyhexadecanoic acid	-0.603008	0.0428518
s__Fusobacterium mortiferum	16-hydroxyhexadecanoic acid	0.609023	0.0408578
s__Escherichia coli	16-hydroxyhexadecanoic acid	0.601504	0.0436763
s__Akkermansia glycaniphila	16-hydroxyhexadecanoic acid	-0.754887	0.0199961
s__Corynebacterium sp. Marseille-P4122	Goitrin	-0.711278	0.0227382
s__Collinsella aerofaciens	Goitrin	0.711278	0.0227382
s__Bacteroides plebeius CAG:211	Goitrin	0.639098	0.036408
s__Cellulosilyticum ruminicola	Goitrin	-0.723308	0.0223994
s__Oscillibacter ruminantium	Goitrin	-0.601504	0.0436763
s__Ruminococcus albus	Goitrin	-0.613534	0.0399815
s__Collinsella aerofaciens	Enniatin b	0.738346	0.0210628
s__Oscillibacter ruminantium	Enniatin b	-0.675188	0.0274173
s__Oscillibacter sp. 1-3	Enniatin b	-0.633083	0.0366021
s__Oscillibacter sp. 57_20	Enniatin b	-0.66015	0.0304737
s__Oscillibacter sp. PC13	Enniatin b	-0.616541	0.039373
s__Oscillibacter valericigenes	Enniatin b	-0.606015	0.041695
s__Angelakisella massiliensis	Enniatin b	-0.607519	0.0411783
s__Bacteroides plebeius CAG:211	O-toluidine	-0.619549	0.0388235
s__Enterococcus cecorum	O-toluidine	-0.736842	0.0210628
s__Ruminococcus albus	O-toluidine	0.658647	0.03106
s__Enterococcus cecorum	Glutaraldehyde	0.613534	0.0399815
s__Cellulosilyticum ruminicola	Stachydrine	-0.724812	0.0223994
s__Collinsella aerofaciens	Ricinoleic acid	0.61203	0.0402589
s__Bacteroides fragilis	Ricinoleic acid	0.643609	0.0353969
s__Bacteroides plebeius	Ricinoleic acid	0.708271	0.0229155
s__Bacteroides plebeius CAG:211	Ricinoleic acid	0.796992	0.0132957
s__Enterococcus cecorum	Ricinoleic acid	0.766917	0.0155916
s__Oscillibacter sp. 1-3	Ricinoleic acid	-0.615038	0.0399815
s__Oscillibacter sp. CAG:155	Ricinoleic acid	-0.62406	0.0382819
s__Ruminococcus albus	Ricinoleic acid	-0.631579	0.0366021
s__Fusobacterium mortiferum	Ricinoleic acid	0.613534	0.0399815
s__Akkermansia glycaniphila	Ricinoleic acid	-0.633083	0.0366021
s__Enterococcus cecorum	Cis-9-palmitoleic acid	0.684211	0.025534
s__Bacteroides fragilis	Gramine	-0.61203	0.0402589
s__Bacteroides plebeius CAG:211	Gramine	-0.711278	0.0227382
s__Enterococcus cecorum	Gramine	-0.607519	0.0411783
s__Oscillibacter sp. 1-3	Gramine	0.613534	0.0399815
s__Oscillibacter sp. 57_20	Gramine	0.613534	0.0399815
s__Oscillibacter sp. CAG:155	Gramine	0.616541	0.039373
s__Angelakisella massiliensis	Gramine	0.66015	0.0304737
s__Fusobacterium mortiferum	Gramine	-0.62406	0.0382819
s__Akkermansia glycaniphila	Gramine	0.687218	0.024959
s__Collinsella aerofaciens	Salicyluric acid	-0.633083	0.0366021
s__Enterococcus cecorum	Myristic acid	0.667669	0.0289241
s__Ruminococcus albus	Myristic acid	-0.634586	0.0366021
s__Bacteroides fragilis	Dl-a-hydroxybutyric acid	0.694737	0.0241105
s__Bacteroides plebeius CAG:211	Dl-a-hydroxybutyric acid	0.652632	0.0319444
s__Ruminococcus albus	Dl-a-hydroxybutyric acid	-0.603008	0.0428518
s__Enterococcus cecorum	Phenaceturic acid	-0.778947	0.0155916
s__Ruminococcus albus	Phenaceturic acid	0.622556	0.0387666
s__Treponema brennaborense	Phenaceturic acid	-0.657143	0.0310748
s__Collinsella aerofaciens	Gamma-l-glutamyl-l-glutamic acid	0.711278	0.0227382
s__Bacteroides fragilis	Gamma-l-glutamyl-l-glutamic acid	0.669173	0.0284049
s__Bacteroides plebeius	Gamma-l-glutamyl-l-glutamic acid	0.655639	0.031256
s__Bacteroides plebeius CAG:211	Gamma-l-glutamyl-l-glutamic acid	0.748872	0.0199961
s__Enterococcus cecorum	Gamma-l-glutamyl-l-glutamic acid	0.682707	0.0255772
s__Oscillibacter sp. 1-3	Gamma-l-glutamyl-l-glutamic acid	-0.696241	0.0241105
s__Oscillibacter sp. 57_20	Gamma-l-glutamyl-l-glutamic acid	-0.693233	0.0241105
s__Oscillibacter sp. CAG:155	Gamma-l-glutamyl-l-glutamic acid	-0.669173	0.0284049
s__Oscillibacter sp. PC13	Gamma-l-glutamyl-l-glutamic acid	-0.670677	0.0283756
s__Fusobacterium mortiferum	Gamma-l-glutamyl-l-glutamic acid	0.621053	0.0388235
s__Akkermansia glycaniphila	Gamma-l-glutamyl-l-glutamic acid	-0.645113	0.0345627
s__Akkermansia glycaniphila	Deoxycholic acid	0.619549	0.0388235
s__Collinsella aerofaciens	N6,N6,N6-Trimethyl-L-lysine	0.693233	0.0241105
s__Cellulosilyticum ruminicola	N6,N6,N6-Trimethyl-L-lysine	-0.625564	0.0381403
s__Cellulosilyticum ruminicola	Folinic acid	-0.627068	0.0374574
s__Bacteroides fragilis	L-palmitoylcarnitine	0.604511	0.0424983
s__Enterococcus cecorum	L-palmitoylcarnitine	0.715789	0.0226842
s__Ruminococcus albus	L-palmitoylcarnitine	-0.673684	0.0275578
s__Cellulosilyticum ruminicola	4-imidazoleacetic acid	-0.712782	0.0227382
s__Oscillibacter ruminantium	4-imidazoleacetic acid	-0.62406	0.0382819
s__Corynebacterium sp. Marseille-P4122	2-amino-1-phenylethanol	-0.691729	0.0241105
s__Bacteroides plebeius	2-amino-1-phenylethanol	0.658647	0.03106
s__Collinsella aerofaciens	Chenodeoxycholate	-0.742857	0.0199961
s__Angelakisella massiliensis	Chenodeoxycholate	0.607519	0.0411783
s__Akkermansia glycaniphila	Chenodeoxycholate	0.670677	0.0283756
s__Corynebacterium sp. Marseille-P4122	DL-phenylalanine	-0.706767	0.0233053
s__Bacteroides plebeius	DL-phenylalanine	0.634586	0.0366021
s__Corynebacterium sp. Marseille-P4122	Norvaline	-0.607519	0.0411783
s__Collinsella aerofaciens	Norvaline	0.651128	0.0323085
s__Bacteroides plebeius	Norvaline	0.732331	0.0210628
s__Bacteroides plebeius CAG:211	Norvaline	0.633083	0.0366021
s__Enterococcus cecorum	Linoleic acid	0.750376	0.0199961
s__Akkermansia glycaniphila	Linoleic acid	-0.61203	0.0402589
s__Bacteroides fragilis	Hippuric acid	-0.715789	0.0226842
s__Bacteroides plebeius CAG:211	Hippuric acid	-0.663158	0.0297813
s__Enterococcus cecorum	Hippuric acid	-0.777444	0.0155916
s__Oscillibacter sp. 1-3	Hippuric acid	0.618045	0.0389395
s__Oscillibacter sp. 57_20	Hippuric acid	0.63609	0.0366021
s__Oscillibacter sp. CAG:155	Hippuric acid	0.621053	0.0388235
s__Oscillibacter sp. PC13	Hippuric acid	0.631579	0.0366021
s__Ruminococcus albus	Hippuric acid	0.747368	0.0199961
s__Fusobacterium mortiferum	Hippuric acid	-0.726316	0.0223994
s__Corynebacterium sp. Marseille-P4122	sn-Glycerol 3-phosphoethanolamine	-0.655639	0.031256
s__Collinsella aerofaciens	sn-Glycerol 3-phosphoethanolamine	0.711278	0.0227382
s__Cellulosilyticum ruminicola	sn-Glycerol 3-phosphoethanolamine	-0.771429	0.0155916
s__Collinsella aerofaciens	1-methyl-l-histidine	-0.643609	0.0353969
s__Cellulosilyticum ruminicola	1-methyl-l-histidine	0.607519	0.0411783
s__Collinsella aerofaciens	1-Methylhistidine	-0.613534	0.0399815
s__Bacteroides plebeius CAG:211	1-Methylhistidine	-0.642105	0.0358292
s__Enterococcus cecorum	1-Methylhistidine	-0.676692	0.0271262
s__Oscillibacter sp. 1-3	1-Methylhistidine	0.736842	0.0210628
s__Oscillibacter sp. 57_20	1-Methylhistidine	0.720301	0.0223994
s__Oscillibacter sp. CAG:155	1-Methylhistidine	0.744361	0.0199961
s__Oscillibacter sp. PC13	1-Methylhistidine	0.694737	0.0241105
s__Angelakisella massiliensis	1-Methylhistidine	0.637594	0.036408
s__Ruminococcus albus	1-Methylhistidine	0.619549	0.0388235
s__Akkermansia glycaniphila	1-Methylhistidine	0.747368	0.0199961
s__Ruminococcus albus	2'-deoxycytidine	-0.618045	0.0389395
s__Desulfovibrio piger	2'-deoxycytidine	0.640602	0.0361379
s__Escherichia coli	2'-deoxycytidine	0.618045	0.0389395
s__Prevotella sp. CAG:279	4-pyridoxic acid	0.760902	0.0174805
s__Enterococcus cecorum	4-pyridoxic acid	-0.688722	0.0247883
s__Butyricicoccus pullicaecorum	4-pyridoxic acid	0.766917	0.0155916
s__Eubacterium sp. CAG:180	4-pyridoxic acid	0.81203	0.0111429
s__Oscillibacter sp. 1-3	4-pyridoxic acid	0.840602	0.00476581
s__Oscillibacter sp. 57_20	4-pyridoxic acid	0.807519	0.0111429
s__Oscillibacter sp. CAG:155	4-pyridoxic acid	0.857143	0.0028417
s__Oscillibacter sp. PC13	4-pyridoxic acid	0.821053	0.00938645
s__Angelakisella massiliensis	4-pyridoxic acid	0.631579	0.0366021
s__Ruminococcus albus	4-pyridoxic acid	0.618045	0.0389395
s__Ruminococcus sp. CAG:563	4-pyridoxic acid	0.682707	0.0255772
s__Flavonifractor sp. An100	4-pyridoxic acid	0.618045	0.0389395
s__uncultured Flavonifractor sp.	4-pyridoxic acid	0.702256	0.0237876
s__Firmicutes bacterium ASF500	4-pyridoxic acid	0.666165	0.02899
s__Firmicutes bacterium CAG:110	4-pyridoxic acid	0.66015	0.0304737
s__Firmicutes bacterium CAG:110_56_8	4-pyridoxic acid	0.685714	0.0251479
s__Escherichia coli	4-pyridoxic acid	-0.615038	0.0399815
s__Collinsella aerofaciens	Salicylic acid	-0.666165	0.02899
s__Enterococcus cecorum	Salicylic acid	-0.778947	0.0155916
s__Ruminococcus albus	Salicylic acid	0.621053	0.0388235
s__Fusobacterium mortiferum	Salicylic acid	-0.609023	0.0408578
s__Escherichia coli	Salicylic acid	-0.637594	0.036408
s__Firmicutes bacterium CAG:103	Creatinine	-0.705263	0.023445
s__Collinsella aerofaciens	Betaine	-0.613534	0.0399815
s__Bacteroides plebeius CAG:211	Betaine	-0.622556	0.0387666
s__Fusobacterium mortiferum	Betaine	-0.687218	0.024959
s__Collinsella aerofaciens	Glycerophosphocholine	0.708271	0.0229155
s__Cellulosilyticum ruminicola	Glycerophosphocholine	-0.699248	0.0239722
s__Collinsella aerofaciens	5-aminovaleric acid	-0.634586	0.0366021
s__Enterococcus cecorum	5-aminovaleric acid	-0.606015	0.041695
s__Cellulosilyticum ruminicola	5-aminovaleric acid	0.627068	0.0374574
s__Ruminococcus albus	5-aminovaleric acid	0.703759	0.0237876
s__Ruminococcus sp. CAG:563	5-aminovaleric acid	0.613534	0.0399815
s__Fusobacterium mortiferum	5-aminovaleric acid	-0.655639	0.031256
s__Escherichia coli	5-aminovaleric acid	-0.610526	0.0407407
s__Oscillibacter sp. 1-3	Histamine	0.601504	0.0436763
s__Bacteroides fragilis	Malonic acid	-0.732331	0.0210628
s__Bacteroides plebeius CAG:211	Malonic acid	-0.663158	0.0297813
s__Enterococcus cecorum	Malonic acid	-0.781955	0.0155916
s__Oscillibacter sp. 1-3	Malonic acid	0.618045	0.0389395
s__Oscillibacter sp. 57_20	Malonic acid	0.633083	0.0366021
s__Oscillibacter sp. CAG:155	Malonic acid	0.625564	0.0381403
s__Oscillibacter sp. PC13	Malonic acid	0.630075	0.036796
s__Ruminococcus albus	Malonic acid	0.720301	0.0223994
s__Fusobacterium mortiferum	Malonic acid	-0.717293	0.0223994
s__Escherichia coli	Malonic acid	-0.606015	0.041695
s__Collinsella aerofaciens	Taurine	0.621053	0.0388235
s__Bacteroides plebeius	Taurine	0.690226	0.0242519
s__Cellulosilyticum ruminicola	Taurine	-0.649624	0.0328207
s__Collinsella aerofaciens	Ketoleucine	0.639098	0.036408
s__Oscillibacter ruminantium	Ketoleucine	-0.654135	0.0317327
s__Ruminococcus sp. CAG:563	Ketoleucine	-0.610526	0.0407407
s__Collinsella aerofaciens	Niacinamide	0.675188	0.0274173
s__Oscillibacter sp. 1-3	Niacinamide	-0.675188	0.0274173
s__Oscillibacter sp. 57_20	Niacinamide	-0.676692	0.0271262
s__Oscillibacter sp. CAG:155	Niacinamide	-0.628571	0.0373454
s__Oscillibacter sp. PC13	Niacinamide	-0.637594	0.036408
s__Akkermansia glycaniphila	Niacinamide	-0.62406	0.0382819
s__Corynebacterium sp. Marseille-P4122	Myo-inositol	-0.673684	0.0275578
s__Collinsella aerofaciens	Myo-inositol	0.669173	0.0284049
s__Cellulosilyticum ruminicola	Myo-inositol	-0.750376	0.0199961
s__Collinsella aerofaciens	Uracil	0.673684	0.0275578
s__Cellulosilyticum ruminicola	Uracil	-0.708271	0.0229155
s__Corynebacterium sp. Marseille-P4122	Phenylalanine	-0.676692	0.0271262
s__Collinsella aerofaciens	Phenylalanine	0.688722	0.0247883
s__Bacteroides plebeius	Phenylalanine	0.693233	0.0241105
s__Bacteroides plebeius CAG:211	Phenylalanine	0.693233	0.0241105
s__Corynebacterium sp. Marseille-P4122	L-aspartic acid	-0.711278	0.0227382
s__Collinsella aerofaciens	L-aspartic acid	0.733835	0.0210628
s__Cellulosilyticum ruminicola	L-aspartic acid	-0.777444	0.0155916
s__Corynebacterium sp. Marseille-P4122	Glutamic acid	-0.66015	0.0304737
s__Collinsella aerofaciens	Glutamic acid	0.693233	0.0241105
s__Bacteroides plebeius CAG:211	Glutamic acid	0.627068	0.0374574
s__Enterococcus cecorum	Glutamic acid	0.604511	0.0424983
s__Cellulosilyticum ruminicola	Glutamic acid	-0.685714	0.0251479
s__Corynebacterium sp. Marseille-P4122	DL-Glutamic acid	-0.676692	0.0271262
s__Cellulosilyticum ruminicola	DL-Glutamic acid	-0.619549	0.0388235
s__Collinsella aerofaciens	L-thiocitrulline	-0.717293	0.0223994
s__Enterococcus cecorum	L-thiocitrulline	-0.631579	0.0366021
s__Oscillibacter sp. 1-3	L-thiocitrulline	0.642105	0.0358292
s__Oscillibacter sp. 57_20	L-thiocitrulline	0.631579	0.0366021
s__Oscillibacter sp. CAG:155	L-thiocitrulline	0.637594	0.036408
s__Oscillibacter sp. PC13	L-thiocitrulline	0.613534	0.0399815
s__Angelakisella massiliensis	L-thiocitrulline	0.634586	0.0366021
s__Akkermansia glycaniphila	L-thiocitrulline	0.625564	0.0381403
s__Collinsella aerofaciens	Pro-hyp	0.62406	0.0382819
s__Cellulosilyticum ruminicola	Pro-hyp	-0.603008	0.0428518
s__Ruminococcus sp. CAG:563	Pro-hyp	-0.616541	0.039373
s__Collinsella aerofaciens	1-(1z-octadecenyl)-sn-glycero-3-phosphocholine	0.723308	0.0223994
s__Cellulosilyticum ruminicola	1-(1z-octadecenyl)-sn-glycero-3-phosphocholine	-0.654135	0.0317327
s__Oscillibacter sp. 1-3	1-(1z-octadecenyl)-sn-glycero-3-phosphocholine	-0.633083	0.0366021
s__Oscillibacter sp. 57_20	1-(1z-octadecenyl)-sn-glycero-3-phosphocholine	-0.630075	0.036796
s__Oscillibacter sp. CAG:155	1-(1z-octadecenyl)-sn-glycero-3-phosphocholine	-0.621053	0.0388235
s__Oscillibacter sp. PC13	1-(1z-octadecenyl)-sn-glycero-3-phosphocholine	-0.609023	0.0408578
s__Bacteroides fragilis	1-hexadecanoyl-2-octadecadienoyl-sn-glycero-3-phosphocholine	-0.630075	0.036796
s__Bacteroides plebeius CAG:211	1-hexadecanoyl-2-octadecadienoyl-sn-glycero-3-phosphocholine	-0.652632	0.0319444
s__Prevotella sp. CAG:279	1-hexadecanoyl-2-octadecadienoyl-sn-glycero-3-phosphocholine	0.603008	0.0428518
s__Enterococcus cecorum	1-hexadecanoyl-2-octadecadienoyl-sn-glycero-3-phosphocholine	-0.747368	0.0199961
s__Oscillibacter sp. 1-3	1-hexadecanoyl-2-octadecadienoyl-sn-glycero-3-phosphocholine	0.634586	0.0366021
s__Oscillibacter sp. 57_20	1-hexadecanoyl-2-octadecadienoyl-sn-glycero-3-phosphocholine	0.631579	0.0366021
s__Oscillibacter sp. CAG:155	1-hexadecanoyl-2-octadecadienoyl-sn-glycero-3-phosphocholine	0.631579	0.0366021
s__Oscillibacter sp. PC13	1-hexadecanoyl-2-octadecadienoyl-sn-glycero-3-phosphocholine	0.62406	0.0382819
s__Ruminococcus albus	1-hexadecanoyl-2-octadecadienoyl-sn-glycero-3-phosphocholine	0.62406	0.0382819
s__Akkermansia glycaniphila	1-hexadecanoyl-2-octadecadienoyl-sn-glycero-3-phosphocholine	0.625564	0.0381403
s__Collinsella aerofaciens	2-oleoyl-1-palmitoyl-sn-glycero-3-phosphocholine	-0.64812	0.0333444
s__Bacteroides fragilis	2-oleoyl-1-palmitoyl-sn-glycero-3-phosphocholine	-0.631579	0.0366021
s__Bacteroides plebeius CAG:211	2-oleoyl-1-palmitoyl-sn-glycero-3-phosphocholine	-0.652632	0.0319444
s__Prevotella sp. CAG:279	2-oleoyl-1-palmitoyl-sn-glycero-3-phosphocholine	0.607519	0.0411783
s__Enterococcus cecorum	2-oleoyl-1-palmitoyl-sn-glycero-3-phosphocholine	-0.696241	0.0241105
s__Butyricicoccus pullicaecorum	2-oleoyl-1-palmitoyl-sn-glycero-3-phosphocholine	0.655639	0.031256
s__Oscillibacter sp. 1-3	2-oleoyl-1-palmitoyl-sn-glycero-3-phosphocholine	0.685714	0.0251479
s__Oscillibacter sp. 57_20	2-oleoyl-1-palmitoyl-sn-glycero-3-phosphocholine	0.661654	0.0304737
s__Oscillibacter sp. CAG:155	2-oleoyl-1-palmitoyl-sn-glycero-3-phosphocholine	0.691729	0.0241105
s__Oscillibacter sp. PC13	2-oleoyl-1-palmitoyl-sn-glycero-3-phosphocholine	0.67218	0.0280423
s__Angelakisella massiliensis	2-oleoyl-1-palmitoyl-sn-glycero-3-phosphocholine	0.619549	0.0388235
s__Fusobacterium mortiferum	2-oleoyl-1-palmitoyl-sn-glycero-3-phosphocholine	-0.64812	0.0333444
s__Desulfovibrio piger	2-oleoyl-1-palmitoyl-sn-glycero-3-phosphocholine	-0.622556	0.0387666
s__Escherichia coli	2-oleoyl-1-palmitoyl-sn-glycero-3-phosphocholine	-0.690226	0.0242519
s__Akkermansia glycaniphila	2-oleoyl-1-palmitoyl-sn-glycero-3-phosphocholine	0.621053	0.0388235
s__Bacteroides plebeius	Thioetheramide-PC	-0.676692	0.0271262
s__Bacteroides plebeius CAG:211	Thioetheramide-PC	-0.637594	0.036408
s__Prevotella sp. CAG:279	Thioetheramide-PC	0.717293	0.0223994
s__Enterococcus cecorum	Thioetheramide-PC	-0.711278	0.0227382
s__Oscillibacter sp. 1-3	Thioetheramide-PC	0.687218	0.024959
s__Oscillibacter sp. 57_20	Thioetheramide-PC	0.663158	0.0297813
s__Oscillibacter sp. CAG:155	Thioetheramide-PC	0.682707	0.0255772
s__Oscillibacter sp. PC13	Thioetheramide-PC	0.657143	0.0310748
s__Collinsella aerofaciens	1-o-hexadecyl-2-deoxy-2-thio-s-acetyl-sn-glyceryl-3-phosphorylcholine	-0.631579	0.0366021
s__Oscillibacter sp. 1-3	1-o-hexadecyl-2-deoxy-2-thio-s-acetyl-sn-glyceryl-3-phosphorylcholine	0.681203	0.0259894
s__Oscillibacter sp. 57_20	1-o-hexadecyl-2-deoxy-2-thio-s-acetyl-sn-glyceryl-3-phosphorylcholine	0.664662	0.0293795
s__Oscillibacter sp. CAG:155	1-o-hexadecyl-2-deoxy-2-thio-s-acetyl-sn-glyceryl-3-phosphorylcholine	0.667669	0.0289241
s__Oscillibacter sp. PC13	1-o-hexadecyl-2-deoxy-2-thio-s-acetyl-sn-glyceryl-3-phosphorylcholine	0.651128	0.0323085
s__Angelakisella massiliensis	1-o-hexadecyl-2-deoxy-2-thio-s-acetyl-sn-glyceryl-3-phosphorylcholine	0.657143	0.0310748
s__Ruminococcus sp. CAG:563	1-o-hexadecyl-2-deoxy-2-thio-s-acetyl-sn-glyceryl-3-phosphorylcholine	0.628571	0.0373454
s__Akkermansia glycaniphila	1-o-hexadecyl-2-deoxy-2-thio-s-acetyl-sn-glyceryl-3-phosphorylcholine	0.609023	0.0408578
s__Collinsella aerofaciens	1-oleoyl-2-myristoyl-sn-glycero-3-phosphocholine	-0.63609	0.0366021
s__Bacteroides fragilis	1-oleoyl-2-myristoyl-sn-glycero-3-phosphocholine	-0.603008	0.0428518
s__Bacteroides plebeius CAG:211	1-oleoyl-2-myristoyl-sn-glycero-3-phosphocholine	-0.690226	0.0242519
s__Prevotella sp. CAG:279	1-oleoyl-2-myristoyl-sn-glycero-3-phosphocholine	0.609023	0.0408578
s__Enterococcus cecorum	1-oleoyl-2-myristoyl-sn-glycero-3-phosphocholine	-0.696241	0.0241105
s__Butyricicoccus pullicaecorum	1-oleoyl-2-myristoyl-sn-glycero-3-phosphocholine	0.627068	0.0374574
s__Oscillibacter sp. 1-3	1-oleoyl-2-myristoyl-sn-glycero-3-phosphocholine	0.618045	0.0389395
s__Oscillibacter sp. CAG:155	1-oleoyl-2-myristoyl-sn-glycero-3-phosphocholine	0.631579	0.0366021
s__Oscillibacter sp. PC13	1-oleoyl-2-myristoyl-sn-glycero-3-phosphocholine	0.604511	0.0424983
s__Fusobacterium mortiferum	1-oleoyl-2-myristoyl-sn-glycero-3-phosphocholine	-0.703759	0.0237876
s__Desulfovibrio piger	1-oleoyl-2-myristoyl-sn-glycero-3-phosphocholine	-0.651128	0.0323085
s__Escherichia coli	1-oleoyl-2-myristoyl-sn-glycero-3-phosphocholine	-0.702256	0.0237876
s__Collinsella aerofaciens	1-hexadecyl-sn-glycero-3-phosphocholine	0.700752	0.0239722
s__Bacteroides plebeius CAG:211	1-hexadecyl-sn-glycero-3-phosphocholine	0.601504	0.0436763
s__Enterococcus cecorum	1-hexadecyl-sn-glycero-3-phosphocholine	0.639098	0.036408
s__Oscillibacter sp. 1-3	1-hexadecyl-sn-glycero-3-phosphocholine	-0.676692	0.0271262
s__Oscillibacter sp. 57_20	1-hexadecyl-sn-glycero-3-phosphocholine	-0.705263	0.023445
s__Oscillibacter sp. CAG:155	1-hexadecyl-sn-glycero-3-phosphocholine	-0.663158	0.0297813
s__Oscillibacter sp. PC13	1-hexadecyl-sn-glycero-3-phosphocholine	-0.66015	0.0304737
s__Ruminococcus sp. CAG:563	1-hexadecyl-sn-glycero-3-phosphocholine	-0.627068	0.0374574
s__Firmicutes bacterium CAG:103	1-hexadecyl-sn-glycero-3-phosphocholine	-0.628571	0.0373454
s__Akkermansia glycaniphila	1-hexadecyl-sn-glycero-3-phosphocholine	-0.654135	0.0317327
s__Collinsella aerofaciens	Valine betaine	-0.729323	0.0223994
s__Bacteroides fragilis	Valine betaine	-0.62406	0.0382819
s__Fusobacterium mortiferum	Valine betaine	-0.669173	0.0284049
s__Corynebacterium sp. Marseille-P4122	N-(aminothioxomethyl)-5-oxo-1-propyl-2-pyrrolidineacetamide	-0.609023	0.0408578
s__Collinsella aerofaciens	N-(aminothioxomethyl)-5-oxo-1-propyl-2-pyrrolidineacetamide	0.684211	0.025534
s__Bacteroides plebeius	N-(aminothioxomethyl)-5-oxo-1-propyl-2-pyrrolidineacetamide	0.610526	0.0407407
s__Bacteroides plebeius CAG:211	N-(aminothioxomethyl)-5-oxo-1-propyl-2-pyrrolidineacetamide	0.681203	0.0259894
s__Cellulosilyticum ruminicola	N-(aminothioxomethyl)-5-oxo-1-propyl-2-pyrrolidineacetamide	-0.619549	0.0388235
s__Fusobacterium mortiferum	N-(aminothioxomethyl)-5-oxo-1-propyl-2-pyrrolidineacetamide	0.640602	0.0361379
s__Collinsella aerofaciens	Linoleic acid methyl ester	0.718797	0.0223994
s__Bacteroides plebeius	Linoleic acid methyl ester	0.718797	0.0223994
s__Bacteroides plebeius CAG:211	Linoleic acid methyl ester	0.699248	0.0239722
s__Enterococcus cecorum	Linoleic acid methyl ester	0.709774	0.0229155
s__Eubacterium sp. CAG:180	Linoleic acid methyl ester	-0.628571	0.0373454
s__Oscillibacter sp. 1-3	Linoleic acid methyl ester	-0.64812	0.0333444
s__Oscillibacter sp. 57_20	Linoleic acid methyl ester	-0.637594	0.036408
s__Oscillibacter sp. CAG:155	Linoleic acid methyl ester	-0.645113	0.0345627
s__Oscillibacter sp. PC13	Linoleic acid methyl ester	-0.613534	0.0399815
s__Akkermansia glycaniphila	Linoleic acid methyl ester	-0.657143	0.0310748
s__Collinsella aerofaciens	Pro-Glu	0.639098	0.036408
s__Akkermansia glycaniphila	Pro-Glu	-0.616541	0.039373
s__Bacteroides fragilis	1-Palmitoyllysophosphatidylcholine	-0.691729	0.0241105
s__Bacteroides plebeius CAG:211	1-Palmitoyllysophosphatidylcholine	-0.682707	0.0255772
s__Enterococcus cecorum	1-Palmitoyllysophosphatidylcholine	-0.690226	0.0242519
s__Collinsella aerofaciens	2,4,6-tri-tert-butylaniline	-0.627068	0.0374574
s__Ruminococcus sp. CAG:563	2,4,6-tri-tert-butylaniline	0.619549	0.0388235
s__Desulfovibrio piger	2,4,6-tri-tert-butylaniline	-0.697744	0.0241105
s__Bacteroides fragilis	D-glucosamine, 6-sulfate	-0.691729	0.0241105
s__Bacteroides plebeius CAG:211	D-glucosamine, 6-sulfate	-0.628571	0.0373454
s__Enterococcus cecorum	D-glucosamine, 6-sulfate	-0.652632	0.0319444
s__Ruminococcus albus	D-glucosamine, 6-sulfate	0.661654	0.0304737
s__Prevotella sp. CAG:279	Arachidonoylthiophosphorylcholine	0.706767	0.0233053
s__Enterococcus cecorum	Arachidonoylthiophosphorylcholine	-0.735338	0.0210628
s__Butyricicoccus pullicaecorum	Arachidonoylthiophosphorylcholine	0.640602	0.0361379
s__Eubacterium sp. CAG:180	Arachidonoylthiophosphorylcholine	0.657143	0.0310748
s__Oscillibacter sp. 1-3	Arachidonoylthiophosphorylcholine	0.760902	0.0174805
s__Oscillibacter sp. 57_20	Arachidonoylthiophosphorylcholine	0.732331	0.0210628
s__Oscillibacter sp. CAG:155	Arachidonoylthiophosphorylcholine	0.769925	0.0155916
s__Oscillibacter sp. PC13	Arachidonoylthiophosphorylcholine	0.745865	0.0199961
s__Angelakisella massiliensis	Arachidonoylthiophosphorylcholine	0.610526	0.0407407
s__Ruminococcus sp. CAG:563	Arachidonoylthiophosphorylcholine	0.618045	0.0389395
s__Akkermansia glycaniphila	Arachidonoylthiophosphorylcholine	0.630075	0.036796
s__Collinsella aerofaciens	Pro-leu	0.700752	0.0239722
s__Bacteroides fragilis	Pro-leu	0.673684	0.0275578
s__Oscillibacter sp. 1-3	Pro-leu	-0.606015	0.041695
s__Oscillibacter sp. 57_20	Pro-leu	-0.634586	0.0366021
s__Akkermansia glycaniphila	Pro-leu	-0.717293	0.0223994
s__Bacteroides fragilis	1-heptadecanoyl-sn-glycero-3-phosphocholine	-0.702256	0.0237876
s__Bacteroides plebeius CAG:211	1-heptadecanoyl-sn-glycero-3-phosphocholine	-0.682707	0.0255772
s__Enterococcus cecorum	1-heptadecanoyl-sn-glycero-3-phosphocholine	-0.645113	0.0345627
s__Treponema brennaborense	1-heptadecanoyl-sn-glycero-3-phosphocholine	-0.621053	0.0388235
s__Collinsella aerofaciens	Lys-Trp-Arg	0.694737	0.0241105
s__Bacteroides plebeius CAG:211	Lys-Trp-Arg	0.609023	0.0408578
s__Akkermansia glycaniphila	Lys-Trp-Arg	-0.649624	0.0328207
s__Collinsella aerofaciens	Lys-Gly	0.619549	0.0388235
s__Bacteroides fragilis	1-pentadecanoyl-sn-glycero-3-phosphocholine	-0.697744	0.0241105
s__Bacteroides plebeius CAG:211	1-pentadecanoyl-sn-glycero-3-phosphocholine	-0.651128	0.0323085
s__Enterococcus cecorum	1-pentadecanoyl-sn-glycero-3-phosphocholine	-0.726316	0.0223994
s__Bacteroides fragilis	Stearoylcarnitine	0.699248	0.0239722
s__Enterococcus cecorum	Stearoylcarnitine	0.684211	0.025534
s__Ruminococcus albus	Stearoylcarnitine	-0.669173	0.0284049
s__Oscillibacter sp. 1-3	Arg-Ala	0.640602	0.0361379
s__Oscillibacter sp. 57_20	Arg-Ala	0.633083	0.0366021
s__Oscillibacter sp. CAG:155	Arg-Ala	0.619549	0.0388235
s__Oscillibacter sp. PC13	Arg-Ala	0.642105	0.0358292
s__Angelakisella massiliensis	Arg-Ala	0.61203	0.0402589
s__uncultured Flavonifractor sp.	Arg-Ala	0.637594	0.036408
s__Escherichia coli	Arg-Ala	-0.642105	0.0358292
s__Collinsella aerofaciens	Asn-Gly-Lys	0.702256	0.0237876
s__Cellulosilyticum ruminicola	Asn-Gly-Lys	-0.64812	0.0333444
s__Ruminococcus albus	Asn-Gly-Lys	-0.603008	0.0428518
s__Prevotella sp. CAG:279	L-propionylcarnitine	0.768421	0.0155916
s__Enterococcus cecorum	L-propionylcarnitine	-0.720301	0.0223994
s__Oscillibacter sp. 1-3	L-propionylcarnitine	0.615038	0.0399815
s__Oscillibacter sp. CAG:155	L-propionylcarnitine	0.640602	0.0361379
s__Enterococcus cecorum	Methyl 2-octynoate	0.609023	0.0408578
s__Akkermansia glycaniphila	Methyl 2-octynoate	-0.664662	0.0293795
s__Collinsella aerofaciens	N-acetylglutamine	0.667669	0.0289241
s__Oscillibacter ruminantium	Ser-Thr	-0.634586	0.0366021
s__Escherichia coli	Lys-Phe-Lys	0.621053	0.0388235
s__Enterococcus cecorum	Met-Met-Arg	0.622556	0.0387666
s__Treponema brennaborense	Met-Met-Arg	0.673684	0.0275578
s__Enterococcus cecorum	1-o-hexadecyl-2-o-(2e-butenoyl)-sn-glyceryl-3-phosphocholine	-0.66015	0.0304737
s__Desulfovibrio piger	1-o-hexadecyl-2-o-(2e-butenoyl)-sn-glyceryl-3-phosphocholine	-0.609023	0.0408578
s__Enterococcus cecorum	1-palmitoyl-2-linoleoyl-sn-glycero-3-phosphocholine	-0.609023	0.0408578
s__Ruminococcus albus	1-palmitoyl-2-linoleoyl-sn-glycero-3-phosphocholine	0.610526	0.0407407
s__Angelakisella massiliensis	Enrofloxacin	-0.61203	0.0402589
s__Firmicutes bacterium CAG:103	Enrofloxacin	-0.697744	0.0241105
s__Collinsella aerofaciens	Gln-glu	0.726316	0.0223994
s__Bacteroides fragilis	Gln-glu	0.627068	0.0374574
s__Bacteroides plebeius	Gln-glu	0.705263	0.023445
s__Bacteroides plebeius CAG:211	Gln-glu	0.724812	0.0223994
s__Enterococcus cecorum	Gln-glu	0.655639	0.031256
s__Oscillibacter sp. 1-3	Gln-glu	-0.691729	0.0241105
s__Oscillibacter sp. 57_20	Gln-glu	-0.685714	0.0251479
s__Oscillibacter sp. CAG:155	Gln-glu	-0.66015	0.0304737
s__Oscillibacter sp. PC13	Gln-glu	-0.664662	0.0293795
s__Akkermansia glycaniphila	Gln-glu	-0.642105	0.0358292
s__Bacteroides plebeius CAG:211	Pc(16:1e/9-hode)	-0.630075	0.036796
s__Enterococcus cecorum	Pc(16:1e/9-hode)	-0.700752	0.0239722
s__Collinsella aerofaciens	(r)-2-hydroxystearic acid	0.723308	0.0223994
s__Bacteroides plebeius	(r)-2-hydroxystearic acid	0.646617	0.0341529
s__Bacteroides plebeius CAG:211	(r)-2-hydroxystearic acid	0.748872	0.0199961
s__Enterococcus cecorum	(r)-2-hydroxystearic acid	0.709774	0.0229155
s__Oscillibacter sp. 1-3	(r)-2-hydroxystearic acid	-0.669173	0.0284049
s__Oscillibacter sp. 57_20	(r)-2-hydroxystearic acid	-0.657143	0.0310748
s__Oscillibacter sp. CAG:155	(r)-2-hydroxystearic acid	-0.666165	0.02899
s__Oscillibacter sp. PC13	(r)-2-hydroxystearic acid	-0.62406	0.0382819
s__Ruminococcus albus	(r)-2-hydroxystearic acid	-0.654135	0.0317327
s__Fusobacterium mortiferum	(r)-2-hydroxystearic acid	0.649624	0.0328207
s__Akkermansia glycaniphila	(r)-2-hydroxystearic acid	-0.603008	0.0428518
s__Enterococcus cecorum	1-stearoyl-2-linoleoyl-sn-glycero-3-phosphoethanolamine	-0.708271	0.0229155
s__Oscillibacter sp. 1-3	1-stearoyl-2-linoleoyl-sn-glycero-3-phosphoethanolamine	0.607519	0.0411783
s__Oscillibacter sp. 57_20	1-stearoyl-2-linoleoyl-sn-glycero-3-phosphoethanolamine	0.616541	0.039373
s__Oscillibacter sp. PC13	1-stearoyl-2-linoleoyl-sn-glycero-3-phosphoethanolamine	0.606015	0.041695
s__Collinsella aerofaciens	9(10)-epoxy-12z-octadecenoic acid	0.666165	0.02899
s__Bacteroides plebeius CAG:211	9(10)-epoxy-12z-octadecenoic acid	0.670677	0.0283756
s__Enterococcus cecorum	9(10)-epoxy-12z-octadecenoic acid	0.766917	0.0155916
s__Oscillibacter sp. 1-3	9(10)-epoxy-12z-octadecenoic acid	-0.622556	0.0387666
s__Oscillibacter sp. 57_20	9(10)-epoxy-12z-octadecenoic acid	-0.618045	0.0389395
s__Oscillibacter sp. CAG:155	9(10)-epoxy-12z-octadecenoic acid	-0.630075	0.036796
s__Akkermansia glycaniphila	9(10)-epoxy-12z-octadecenoic acid	-0.724812	0.0223994
s__Collinsella aerofaciens	Ile-Asp	0.73985	0.0207803
s__Bacteroides plebeius CAG:211	Ile-Asp	0.721805	0.0223994
s__Akkermansia glycaniphila	Ile-Asp	-0.61203	0.0402589
s__Enterococcus cecorum	1h-indole-3-propanoic acid	-0.741353	0.0203801
s__Ruminococcus albus	1h-indole-3-propanoic acid	0.630075	0.036796
s__Collinsella aerofaciens	all cis-(6,9,12)-Linolenic acid	0.61203	0.0402589
s__Bacteroides fragilis	all cis-(6,9,12)-Linolenic acid	0.607519	0.0411783
s__Enterococcus cecorum	all cis-(6,9,12)-Linolenic acid	0.769925	0.0155916
s__Oscillibacter sp. 1-3	all cis-(6,9,12)-Linolenic acid	-0.616541	0.039373
s__Oscillibacter sp. 57_20	all cis-(6,9,12)-Linolenic acid	-0.606015	0.041695
s__Oscillibacter sp. CAG:155	all cis-(6,9,12)-Linolenic acid	-0.633083	0.0366021
s__Oscillibacter sp. PC13	all cis-(6,9,12)-Linolenic acid	-0.606015	0.041695
s__Ruminococcus albus	all cis-(6,9,12)-Linolenic acid	-0.714286	0.0227382
s__Akkermansia glycaniphila	all cis-(6,9,12)-Linolenic acid	-0.678195	0.0271262
s__Prevotella sp. CAG:279	Pc(18:1e/9-hode)	0.658647	0.03106
s__Enterococcus cecorum	Pc(18:1e/9-hode)	-0.678195	0.0271262
s__Oscillibacter sp. 1-3	Pc(18:1e/9-hode)	0.622556	0.0387666
s__Oscillibacter sp. CAG:155	Pc(18:1e/9-hode)	0.619549	0.0388235
s__Oscillibacter sp. PC13	Pc(18:1e/9-hode)	0.613534	0.0399815
s__Bacteroides plebeius CAG:211	Loxistatin acid	0.657143	0.0310748
s__Prevotella sp. CAG:279	Loxistatin acid	-0.639098	0.036408
s__Enterococcus cecorum	Loxistatin acid	0.769925	0.0155916
s__Butyricicoccus pullicaecorum	Loxistatin acid	-0.631579	0.0366021
s__Eubacterium sp. CAG:180	Loxistatin acid	-0.609023	0.0408578
s__Oscillibacter sp. 1-3	Loxistatin acid	-0.645113	0.0345627
s__Oscillibacter sp. CAG:155	Loxistatin acid	-0.678195	0.0271262
s__Oscillibacter sp. PC13	Loxistatin acid	-0.607519	0.0411783
s__Ruminococcus albus	Loxistatin acid	-0.603008	0.0428518
s__Fusobacterium mortiferum	Loxistatin acid	0.634586	0.0366021
s__Escherichia coli	Loxistatin acid	0.67218	0.0280423
s__Collinsella aerofaciens	Hydroxyisocaproic acid	0.603008	0.0428518
s__Bacteroides plebeius CAG:211	Hydroxyisocaproic acid	0.627068	0.0374574
s__Cellulosilyticum ruminicola	Hydroxyisocaproic acid	-0.631579	0.0366021
s__Collinsella aerofaciens	PGF2a	0.912782	8.26622e-05
s__Cellulosilyticum ruminicola	PGF2a	-0.63609	0.0366021
s__Enterococcus cecorum	Indoxyl sulfate	-0.634586	0.0366021
s__Ruminococcus albus	Indoxyl sulfate	0.666165	0.02899
s__Corynebacterium sp. Marseille-P4122	3-hydroxyglutaric acid	-0.615038	0.0399815
s__Collinsella aerofaciens	3-hydroxyglutaric acid	0.652632	0.0319444
s__Bacteroides plebeius	3-hydroxyglutaric acid	0.742857	0.0199961
s__Bacteroides plebeius CAG:211	3-hydroxyglutaric acid	0.679699	0.0267658
s__Enterococcus cecorum	17,20-dimethylprostaglandin f1.alpha.	0.742857	0.0199961
s__Treponema brennaborense	17,20-dimethylprostaglandin f1.alpha.	0.699248	0.0239722
s__Corynebacterium sp. Marseille-P4122	2-methyl-3-hydroxybutyric acid	-0.613534	0.0399815
s__Oscillibacter sp. 1-3	2-methyl-3-hydroxybutyric acid	-0.610526	0.0407407
s__Prevotella sp. CAG:279	1,2-dioleoyl-sn-glycero-3-phosphoethanolamine-n,n-dimethyl	0.610526	0.0407407
s__Butyricicoccus pullicaecorum	Methanone, [6-hydroxy-1-[2-(4-morpholinyl)ethyl]-1h-indol-3-yl]-1-naphthalenyl-	0.621053	0.0388235
s__Oscillibacter ruminantium	Methanone, [6-hydroxy-1-[2-(4-morpholinyl)ethyl]-1h-indol-3-yl]-1-naphthalenyl-	0.615038	0.0399815
s__Oscillibacter valericigenes	Methanone, [6-hydroxy-1-[2-(4-morpholinyl)ethyl]-1h-indol-3-yl]-1-naphthalenyl-	0.652632	0.0319444
s__Ruminococcus sp. CAG:563	Methanone, [6-hydroxy-1-[2-(4-morpholinyl)ethyl]-1h-indol-3-yl]-1-naphthalenyl-	0.633083	0.0366021
s__uncultured Flavonifractor sp.	Methanone, [6-hydroxy-1-[2-(4-morpholinyl)ethyl]-1h-indol-3-yl]-1-naphthalenyl-	0.670677	0.0283756
s__Firmicutes bacterium CAG:103	Methanone, [6-hydroxy-1-[2-(4-morpholinyl)ethyl]-1h-indol-3-yl]-1-naphthalenyl-	0.687218	0.024959
s__Firmicutes bacterium CAG:124	Methanone, [6-hydroxy-1-[2-(4-morpholinyl)ethyl]-1h-indol-3-yl]-1-naphthalenyl-	0.681203	0.0259894
s__Firmicutes bacterium CAG:137	Methanone, [6-hydroxy-1-[2-(4-morpholinyl)ethyl]-1h-indol-3-yl]-1-naphthalenyl-	0.627068	0.0374574
s__Fusobacterium mortiferum	Methanone, [6-hydroxy-1-[2-(4-morpholinyl)ethyl]-1h-indol-3-yl]-1-naphthalenyl-	-0.621053	0.0388235
s__Escherichia coli	Methanone, [6-hydroxy-1-[2-(4-morpholinyl)ethyl]-1h-indol-3-yl]-1-naphthalenyl-	-0.67218	0.0280423
s__Collinsella aerofaciens	1-(5z,8z,11z,14z-eicosatetraenoyl)-sn-glycero-3-phosphate	0.732331	0.0210628
s__Oscillibacter sp. 1-3	1-(5z,8z,11z,14z-eicosatetraenoyl)-sn-glycero-3-phosphate	-0.634586	0.0366021
s__Oscillibacter sp. 57_20	1-(5z,8z,11z,14z-eicosatetraenoyl)-sn-glycero-3-phosphate	-0.645113	0.0345627
s__Angelakisella massiliensis	1-(5z,8z,11z,14z-eicosatetraenoyl)-sn-glycero-3-phosphate	-0.630075	0.036796
s__Akkermansia glycaniphila	1-(5z,8z,11z,14z-eicosatetraenoyl)-sn-glycero-3-phosphate	-0.655639	0.031256
s__Enterococcus cecorum	2-hydroxymyristic acid	0.694737	0.0241105
s__Ruminococcus albus	2-hydroxymyristic acid	-0.694737	0.0241105
s__Prevotella sp. CAG:279	Pc(17:1/9-hode)	0.639098	0.036408
s__Enterococcus cecorum	Pc(17:1/9-hode)	-0.651128	0.0323085
s__Butyricicoccus pullicaecorum	Pc(17:1/9-hode)	0.675188	0.0274173
s__Oscillibacter sp. 1-3	Pc(17:1/9-hode)	0.637594	0.036408
s__Oscillibacter sp. 57_20	Pc(17:1/9-hode)	0.61203	0.0402589
s__Oscillibacter sp. CAG:155	Pc(17:1/9-hode)	0.646617	0.0341529
s__Oscillibacter sp. PC13	Pc(17:1/9-hode)	0.640602	0.0361379
s__Angelakisella massiliensis	Pc(17:1/9-hode)	0.618045	0.0389395
s__Fusobacterium mortiferum	Pc(17:1/9-hode)	-0.61203	0.0402589

## Sheet: Table S19
Supplementary Table 19. Associations between significantly different gut microbes and metabolites in Ma and Oa groups
Microbial species	Metabolites	Correlation coefficients	Corrected P-values
s__Clostridium perfringens	7-methylguanosine	0.687218	0.0494895
s__Erysipelotrichaceae bacterium NK3D112	7-methylguanosine	-0.627068	0.0557717
s__Firmicutes bacterium CAG:145	7-methylguanosine	0.610526	0.0587287
s__Firmicutes bacterium CAG:238	7-methylguanosine	0.634586	0.0557717
s__Firmicutes bacterium CAG:646	7-methylguanosine	-0.619549	0.0564263
s__Firmicutes bacterium CAG:238	16-Hydroxypalmitic acid	0.640602	0.0557717
s__Clostridium perfringens	Naltrindole	0.607519	0.0590196
s__Oscillibacter sp. CAG:241	Glutaraldehyde	-0.615038	0.0587287
s__Oscillibacter sp. CAG:241_62_21	Glutaraldehyde	-0.646617	0.0557717
s__Clostridium sp. CAG:221	Anacardic acid	0.655639	0.0557717
s__Firmicutes bacterium CAG:145	Anacardic acid	0.783459	0.0277695
s__Firmicutes bacterium CAG:238	Anacardic acid	0.699248	0.0494895
s__Clostridium perfringens	Stachydrine	0.609023	0.0587287
s__Firmicutes bacterium CAG:145	1,5-pentanediamine	-0.622556	0.0557717
s__Firmicutes bacterium CAG:238	1,5-pentanediamine	-0.615038	0.0587287
s__Clostridium botulinum	Imidazole	-0.655639	0.0557717
s__Clostridium butyricum	Imidazole	-0.700752	0.0494895
s__Clostridium celatum	Imidazole	-0.670677	0.0512992
s__Clostridium disporicum	Imidazole	-0.613534	0.0587287
s__Clostridium perfringens	Imidazole	-0.630075	0.0557717
s__Clostridium sp. Marseille-P299	Imidazole	-0.622556	0.0557717
s__Niameybacter massiliensis	Imidazole	-0.628571	0.0557717
s__Clostridiales bacterium 42_27	Imidazole	0.630075	0.0557717
s__Erysipelotrichaceae bacterium NK3D112	Imidazole	0.613534	0.0587287
s__Firmicutes bacterium CAG:145	Imidazole	-0.712782	0.0494895
s__Firmicutes bacterium CAG:238	Imidazole	-0.681203	0.0494895
s__Clostridium sp. CAG:221	Dl-lactate	-0.610526	0.0587287
s__Firmicutes bacterium CAG:145	Dl-lactate	-0.667669	0.0512992
s__Firmicutes bacterium CAG:238	Dl-lactate	-0.64812	0.0557717
s__Bifidobacterium pseudolongum	Creatinine	0.627068	0.0557717
s__Clostridium botulinum	Creatinine	0.622556	0.0557717
s__Clostridium butyricum	Creatinine	0.622556	0.0557717
s__Clostridium celatum	Creatinine	0.688722	0.0494895
s__Clostridium disporicum	Creatinine	0.667669	0.0512992
s__Clostridium perfringens	Creatinine	0.72782	0.0494895
s__Clostridium sp. CAG:221	Creatinine	0.639098	0.0557717
s__Clostridium sp. Marseille-P299	Creatinine	0.61203	0.0587287
s__Niameybacter massiliensis	Creatinine	0.699248	0.0494895
s__Romboutsia ilealis	Creatinine	0.619549	0.0564263
s__Romboutsia timonensis	Creatinine	0.613534	0.0587287
s__Clostridiales bacterium 59_14	Creatinine	-0.62406	0.0557717
s__Erysipelotrichaceae bacterium NK3D112	Creatinine	-0.697744	0.0494895
s__Firmicutes bacterium CAG:145	Creatinine	0.687218	0.0494895
s__Firmicutes bacterium CAG:238	Creatinine	0.694737	0.0494895
s__Firmicutes bacterium CAG:240	Creatinine	-0.667669	0.0512992
s__Firmicutes bacterium CAG:24053_14	Creatinine	-0.678195	0.0498339
s__Firmicutes bacterium CAG:646	Creatinine	-0.675188	0.0506211
s__Bifidobacterium pseudolongum	Guanidoacetic acid	0.618045	0.057564
s__Bacteroides plebeius CAG:211	Guanidoacetic acid	-0.609023	0.0587287
s__Listeria monocytogenes	Guanidoacetic acid	0.643609	0.0557717
s__Clostridium botulinum	Guanidoacetic acid	0.666165	0.0512992
s__Clostridium butyricum	Guanidoacetic acid	0.609023	0.0587287
s__Clostridium celatum	Guanidoacetic acid	0.690226	0.0494895
s__Clostridium disporicum	Guanidoacetic acid	0.681203	0.0494895
s__Clostridium perfringens	Guanidoacetic acid	0.639098	0.0557717
s__Clostridium sp. Marseille-P299	Guanidoacetic acid	0.772932	0.0277695
s__Lachnoclostridium phytofermentans	Guanidoacetic acid	0.77594	0.0277695
s__Niameybacter massiliensis	Guanidoacetic acid	0.642105	0.0557717
s__Clostridiales bacterium NK3B98	Guanidoacetic acid	-0.610526	0.0587287
s__Firmicutes bacterium CAG:24053_14	Guanidoacetic acid	-0.604511	0.0593508
s__Firmicutes bacterium CAG:555	Guanidoacetic acid	-0.642105	0.0557717
s__Prevotella sp. P2-180	Histamine	0.631579	0.0557717
s__Prevotella sp. P5-92	Histamine	0.601504	0.0593508
s__Firmicutes bacterium CAG:145	Sarcosine	-0.621053	0.0564263
s__Clostridium perfringens	Myo-inositol	0.64812	0.0557717
s__Clostridium sp. CAG:221	Myo-inositol	0.628571	0.0557717
s__Clostridium celatum	O-acetylsolasodine	0.606015	0.0593508
s__Clostridium perfringens	O-acetylsolasodine	0.67218	0.0512992
s__Firmicutes bacterium CAG:240	O-acetylsolasodine	-0.66015	0.0557717
s__Firmicutes bacterium CAG:24053_14	O-acetylsolasodine	-0.631579	0.0557717
s__Clostridium celatum	Ile-Tyr	-0.601504	0.0593508
s__Firmicutes bacterium CAG:145	Ile-Tyr	-0.679699	0.0494895
s__Clostridium butyricum	1-myristoyl-sn-glycero-3-phosphocholine	-0.607519	0.0590196
s__Clostridium celatum	1-myristoyl-sn-glycero-3-phosphocholine	-0.625564	0.0557717
s__Clostridium perfringens	1-myristoyl-sn-glycero-3-phosphocholine	-0.642105	0.0557717
s__Clostridium sp. CAG:221	1-myristoyl-sn-glycero-3-phosphocholine	-0.690226	0.0494895
s__Romboutsia ilealis	1-myristoyl-sn-glycero-3-phosphocholine	-0.646617	0.0557717
s__Romboutsia timonensis	1-myristoyl-sn-glycero-3-phosphocholine	-0.651128	0.0557717
s__Firmicutes bacterium CAG:145	1-myristoyl-sn-glycero-3-phosphocholine	-0.772932	0.0277695
s__Firmicutes bacterium CAG:238	1-myristoyl-sn-glycero-3-phosphocholine	-0.750376	0.0476136
s__Firmicutes bacterium CAG:646	1-myristoyl-sn-glycero-3-phosphocholine	0.630075	0.0557717
s__Brachybacterium nesterenkovii	Pro-hyp	0.654135	0.0557717
s__Firmicutes bacterium CAG:145	Pro-hyp	0.61203	0.0587287
s__Firmicutes bacterium CAG:238	Pro-hyp	0.62406	0.0557717
s__Firmicutes bacterium CAG:240	Pro-hyp	-0.652632	0.0557717
s__Firmicutes bacterium CAG:24053_14	Pro-hyp	-0.642105	0.0557717
s__Clostridium botulinum	Lpc 16:0	-0.603008	0.0593508
s__Clostridium celatum	Lpc 16:0	-0.645113	0.0557717
s__Clostridium disporicum	Lpc 16:0	-0.609023	0.0587287
s__Clostridium perfringens	Lpc 16:0	-0.733835	0.0494895
s__Clostridium sp. CAG:221	Lpc 16:0	-0.628571	0.0557717
s__Niameybacter massiliensis	Lpc 16:0	-0.634586	0.0557717
s__Romboutsia ilealis	Lpc 16:0	-0.630075	0.0557717
s__Romboutsia timonensis	Lpc 16:0	-0.628571	0.0557717
s__Firmicutes bacterium CAG:145	Lpc 16:0	-0.691729	0.0494895
s__Firmicutes bacterium CAG:238	Lpc 16:0	-0.619549	0.0564263
s__Clostridium perfringens	3-oxazolidinecarboxylic acid, 2,2-dimethyl-4-(1-oxo-2-hexadecyn-1-yl)-, 1,1-dimethylethyl ester, (4s)-	0.62406	0.0557717
s__Firmicutes bacterium CAG:238	3-oxazolidinecarboxylic acid, 2,2-dimethyl-4-(1-oxo-2-hexadecyn-1-yl)-, 1,1-dimethylethyl ester, (4s)-	0.633083	0.0557717
s__Clostridium perfringens	1-palmitoyl-sn-glycero-3-phosphocholine	-0.646617	0.0557717
s__Clostridium sp. CAG:221	1-palmitoyl-sn-glycero-3-phosphocholine	-0.615038	0.0587287
s__Romboutsia ilealis	1-palmitoyl-sn-glycero-3-phosphocholine	-0.610526	0.0587287
s__Romboutsia timonensis	1-palmitoyl-sn-glycero-3-phosphocholine	-0.61203	0.0587287
s__Firmicutes bacterium CAG:145	1-palmitoyl-sn-glycero-3-phosphocholine	-0.723308	0.0494895
s__Firmicutes bacterium CAG:238	1-palmitoyl-sn-glycero-3-phosphocholine	-0.681203	0.0494895
s__Prevotella sp. P2-180	L-NG-Monomethylarginine	-0.603008	0.0593508
s__Listeria monocytogenes	L-NG-Monomethylarginine	0.627068	0.0557717
s__Butyricicoccus pullicaecorum	L-NG-Monomethylarginine	-0.679699	0.0494895
s__Clostridium botulinum	L-NG-Monomethylarginine	0.706767	0.0494895
s__Clostridium butyricum	L-NG-Monomethylarginine	0.723308	0.0494895
s__Clostridium celatum	L-NG-Monomethylarginine	0.694737	0.0494895
s__Clostridium disporicum	L-NG-Monomethylarginine	0.666165	0.0512992
s__Clostridium perfringens	L-NG-Monomethylarginine	0.666165	0.0512992
s__Clostridium sp. CAG:221	L-NG-Monomethylarginine	0.697744	0.0494895
s__Clostridium sp. CAG:452	L-NG-Monomethylarginine	0.645113	0.0557717
s__Niameybacter massiliensis	L-NG-Monomethylarginine	0.675188	0.0506211
s__Romboutsia ilealis	L-NG-Monomethylarginine	0.627068	0.0557717
s__Romboutsia timonensis	L-NG-Monomethylarginine	0.622556	0.0557717
s__Clostridiales bacterium 42_27	L-NG-Monomethylarginine	-0.685714	0.0494895
s__Clostridiales bacterium NK3B98	L-NG-Monomethylarginine	-0.646617	0.0557717
s__Firmicutes bacterium CAG:555	L-NG-Monomethylarginine	-0.679699	0.0494895
s__Firmicutes bacterium CAG:646	L-NG-Monomethylarginine	-0.610526	0.0587287
s__Oscillibacter sp. CAG:241	4-ketopimelic acid	-0.657143	0.0557717
s__Oscillibacter sp. CAG:241_62_21	4-ketopimelic acid	-0.690226	0.0494895
s__Firmicutes bacterium CAG:24053_14	4-ketopimelic acid	-0.642105	0.0557717
s__Firmicutes bacterium CAG:145	1,2-diamino-2-methylpropane	-0.625564	0.0557717
s__Firmicutes bacterium CAG:238	1,2-diamino-2-methylpropane	-0.640602	0.0557717
s__Clostridium botulinum	Val-Ala-Lys	-0.607519	0.0590196
s__Firmicutes bacterium CAG:24053_14	Val-Ala-Lys	0.601504	0.0593508
s__Clostridium perfringens	Heptadecasphinganine	-0.642105	0.0557717
s__Firmicutes bacterium CAG:145	Heptadecasphinganine	-0.694737	0.0494895
s__Firmicutes bacterium CAG:238	Heptadecasphinganine	-0.649624	0.0557717
s__Treponema brennaborense	17,20-dimethylprostaglandin f1.alpha.	0.622556	0.0557717
s__Clostridium butyricum	3.alpha.,7.alpha.-dihydroxy-12-oxocholanoic acid	0.631579	0.0557717
s__Clostridium sp. CAG:221	3.alpha.,7.alpha.-dihydroxy-12-oxocholanoic acid	0.684211	0.0494895
s__Firmicutes bacterium CAG:145	3.alpha.,7.alpha.-dihydroxy-12-oxocholanoic acid	0.619549	0.0564263
s__Firmicutes bacterium CAG:238	3.alpha.,7.alpha.-dihydroxy-12-oxocholanoic acid	0.63609	0.0557717
s__Firmicutes bacterium CAG:240	3.alpha.,7.alpha.-dihydroxy-12-oxocholanoic acid	-0.655639	0.0557717
s__Firmicutes bacterium CAG:24053_14	3.alpha.,7.alpha.-dihydroxy-12-oxocholanoic acid	-0.652632	0.0557717

## Sheet: Table S20
Supplementary Table 20. Associations between significantly different salivary microbes and metabolites in Ad and Oa groups
Microbial species	Metabolites	Correlation coefficients	Corrected P-values
s__Petrimonas sp. IBARAKI	Fenpropidin	0.699248	0.0397083
s__Bacteroidia bacterium 43-41	Fenpropidin	0.681203	0.0428641
s__Chryseobacterium chaponense	Fenpropidin	-0.603008	0.0595897
s__Anaerolineaceae bacterium oral taxon 439	Fenpropidin	0.732331	0.0297527
s__Petrimonas sp. IBARAKI	Pyridaben	-0.615038	0.0546479
s__Anaerolineaceae bacterium oral taxon 439	Pyridaben	-0.616541	0.0546479
s__Peptostreptococcus sp. D1	Pyridaben	-0.679699	0.0428641
s__Staphylococcus sciuri	16-hydroxyhexadecanoic acid	-0.688722	0.0425027
s__Escherichia coli	16-hydroxyhexadecanoic acid	-0.688722	0.0425027
s__Actinobacillus seminis	16-hydroxyhexadecanoic acid	-0.663158	0.0441249
s__Petrimonas sp. IBARAKI	Goitrin	-0.661654	0.0445244
s__Anaerolineaceae bacterium oral taxon 439	Goitrin	-0.634586	0.0502498
s__Staphylococcus sciuri	Goitrin	-0.696241	0.0410927
s__Streptococcus orisratti	Goitrin	-0.706767	0.036443
s__Escherichia coli	Goitrin	-0.655639	0.0445244
s__Actinobacillus seminis	Goitrin	-0.637594	0.0500164
s__Petrimonas sp. IBARAKI	Enniatin b	-0.601504	0.0601824
s__Staphylococcus sciuri	Enniatin b	-0.619549	0.0542434
s__Moraxella pluranimalium	O-toluidine	0.633083	0.0510674
s__Tessaracoccus massiliensis	Glutaraldehyde	-0.61203	0.0559877
s__Staphylococcus sciuri	Glutaraldehyde	-0.61203	0.0559877
s__Escherichia coli	Glutaraldehyde	-0.607519	0.0579129
s__Petrimonas sp. IBARAKI	Stachydrine	-0.762406	0.023793
s__Prevotella sp. HUN102	Stachydrine	-0.654135	0.0447664
s__Bacteroidia bacterium 43-41	Stachydrine	-0.702256	0.0391273
s__Chryseobacterium indologenes	Stachydrine	0.604511	0.0588196
s__Chryseobacterium sp. 39-10	Stachydrine	0.603008	0.0595897
s__Chryseobacterium taklimakanense	Stachydrine	0.618045	0.0546479
s__Cruoricaptor ignavus	Stachydrine	0.628571	0.051311
s__Anaerolineaceae bacterium oral taxon 439	Stachydrine	-0.748872	0.0257038
s__Petrimonas sp. IBARAKI	Ricinoleic acid	-0.642105	0.0487959
s__Anaerolineaceae bacterium oral taxon 439	Ricinoleic acid	-0.681203	0.0428641
s__Staphylococcus sciuri	Ricinoleic acid	-0.664662	0.0435387
s__Escherichia coli	Ricinoleic acid	-0.670677	0.0435387
s__Chlamydia trachomatis	Cis-9-palmitoleic acid	-0.610526	0.0562814
s__Staphylococcus sciuri	Gramine	0.67218	0.0435387
s__Helcococcus kunzii	Gramine	0.694737	0.0419896
s__Helcococcus sueciensis	Gramine	0.678195	0.0428641
s__Escherichia coli	Gramine	0.62406	0.0527503
s__Actinobacillus seminis	Gramine	0.61203	0.0559877
s__Flavobacterium marinum	Salicyluric acid	-0.630075	0.0510674
s__Chlamydia trachomatis	Salicyluric acid	0.684211	0.0428641
s__Peptostreptococcus sp. D1	Salicyluric acid	0.628571	0.051311
s__Actinobacillus seminis	Salicyluric acid	0.690226	0.0425027
s__Capnocytophaga canimorsus	Gabapentin	0.619549	0.0542434
s__Flavobacterium columnare	Gabapentin	0.669173	0.0435387
s__Flavobacterium marinum	Gabapentin	0.643609	0.0479653
s__Streptococcus orisratti	Gabapentin	-0.708271	0.03571
s__Staphylococcus sciuri	Dl-a-hydroxybutyric acid	-0.606015	0.0582589
s__Escherichia coli	Dl-a-hydroxybutyric acid	-0.646617	0.0474868
s__Moraxella pluranimalium	Phenaceturic acid	0.616541	0.0546479
s__Petrimonas sp. IBARAKI	Gamma-l-glutamyl-l-glutamic acid	-0.625564	0.0526739
s__Anaerolineaceae bacterium oral taxon 439	Gamma-l-glutamyl-l-glutamic acid	-0.645113	0.0475707
s__Staphylococcus sciuri	Gamma-l-glutamyl-l-glutamic acid	-0.714286	0.0340907
s__Streptococcus orisratti	Gamma-l-glutamyl-l-glutamic acid	-0.663158	0.0441249
s__Escherichia coli	Gamma-l-glutamyl-l-glutamic acid	-0.78797	0.0198817
s__Peptostreptococcus sp. D1	Deoxycholic acid	0.63609	0.0502498
s__Petrimonas sp. IBARAKI	N6,N6,N6-Trimethyl-L-lysine	-0.747368	0.0257038
s__Tannerella forsythia	N6,N6,N6-Trimethyl-L-lysine	-0.61203	0.0559877
s__Bacteroidia bacterium 43-41	N6,N6,N6-Trimethyl-L-lysine	-0.678195	0.0428641
s__Flavobacterium ummariense	N6,N6,N6-Trimethyl-L-lysine	0.616541	0.0546479
s__Anaerolineaceae bacterium oral taxon 439	N6,N6,N6-Trimethyl-L-lysine	-0.717293	0.0328525
s__Staphylococcus sciuri	N6,N6,N6-Trimethyl-L-lysine	-0.691729	0.0425027
s__Streptococcus orisratti	N6,N6,N6-Trimethyl-L-lysine	-0.678195	0.0428641
s__Escherichia coli	N6,N6,N6-Trimethyl-L-lysine	-0.670677	0.0435387
s__Flavobacterium marinum	L-palmitoylcarnitine	0.606015	0.0582589
s__Peptostreptococcus sp. D1	L-palmitoylcarnitine	-0.609023	0.0570898
s__Actinobacillus minor	L-palmitoylcarnitine	-0.669173	0.0435387
s__Actinobacillus seminis	L-palmitoylcarnitine	-0.667669	0.0435387
s__Petrimonas sp. IBARAKI	4-imidazoleacetic acid	-0.682707	0.0428641
s__Prevotella sp. HUN102	4-imidazoleacetic acid	-0.675188	0.0435387
s__Bacteroidia bacterium 43-41	4-imidazoleacetic acid	-0.619549	0.0542434
s__Anaerolineaceae bacterium oral taxon 439	4-imidazoleacetic acid	-0.640602	0.0488179
s__Streptococcus orisratti	4-imidazoleacetic acid	-0.62406	0.0527503
s__Corynebacterium pollutisoli	2-amino-1-phenylethanol	-0.657143	0.0445244
s__Corynebacterium sp. Marseille-P4122	2-amino-1-phenylethanol	-0.693233	0.0425027
s__Corynebacterium xerosis	2-amino-1-phenylethanol	-0.705263	0.0371964
s__Brachybacterium muris	2-amino-1-phenylethanol	-0.642105	0.0487959
s__Kocuria sp. WRN011	2-amino-1-phenylethanol	-0.630075	0.0510674
s__Kocuria sp. ZOR0020	2-amino-1-phenylethanol	-0.627068	0.0516951
s__Staphylococcus sciuri	2-amino-1-phenylethanol	-0.667669	0.0435387
s__Globicatella sulfidifaciens	2-amino-1-phenylethanol	-0.604511	0.0588196
s__Escherichia coli	2-amino-1-phenylethanol	-0.669173	0.0435387
s__Chlamydia trachomatis	Chenodeoxycholate	0.667669	0.0435387
s__Staphylococcus sciuri	Chenodeoxycholate	0.628571	0.051311
s__Streptococcus orisratti	Chenodeoxycholate	0.744361	0.0257038
s__Peptostreptococcus sp. D1	Chenodeoxycholate	0.705263	0.0371964
s__Escherichia coli	Chenodeoxycholate	0.684211	0.0428641
s__Moraxella pluranimalium	Chenodeoxycholate	0.630075	0.0510674
s__Corynebacterium pollutisoli	DL-phenylalanine	-0.685714	0.0428641
s__Corynebacterium sp. Marseille-P4122	DL-phenylalanine	-0.729323	0.0314703
s__Corynebacterium xerosis	DL-phenylalanine	-0.738346	0.0285954
s__Brachybacterium muris	DL-phenylalanine	-0.655639	0.0445244
s__Kocuria sp. WRN011	DL-phenylalanine	-0.651128	0.0456223
s__Kocuria sp. ZOR0020	DL-phenylalanine	-0.630075	0.0510674
s__Staphylococcus sciuri	DL-phenylalanine	-0.679699	0.0428641
s__Globicatella sulfidifaciens	DL-phenylalanine	-0.634586	0.0502498
s__Escherichia coli	DL-phenylalanine	-0.678195	0.0428641
s__Staphylococcus sciuri	Norvaline	-0.621053	0.0540982
s__Escherichia coli	Norvaline	-0.646617	0.0474868
s__Staphylococcus sciuri	Linoleic acid	-0.62406	0.0527503
s__Corynebacterium pollutisoli	Hippuric acid	0.634586	0.0502498
s__Brachybacterium muris	Hippuric acid	0.63609	0.0502498
s__Kocuria sp. ZOR0020	Hippuric acid	0.633083	0.0510674
s__Nigerium massiliense	Hippuric acid	0.657143	0.0445244
s__Tessaracoccus massiliensis	Hippuric acid	0.63609	0.0502498
s__Staphylococcus sciuri	Hippuric acid	0.748872	0.0257038
s__Globicatella sulfidifaciens	Hippuric acid	0.634586	0.0502498
s__Helcococcus kunzii	Hippuric acid	0.667669	0.0435387
s__Helcococcus sueciensis	Hippuric acid	0.652632	0.0454853
s__Escherichia coli	Hippuric acid	0.630075	0.0510674
s__Actinobacillus minor	Hippuric acid	0.615038	0.0546479
s__Actinobacillus seminis	Hippuric acid	0.76391	0.023793
s__Moraxella pluranimalium	Hippuric acid	0.622556	0.0536422
s__Petrimonas sp. IBARAKI	sn-Glycerol 3-phosphoethanolamine	-0.615038	0.0546479
s__Staphylococcus sciuri	sn-Glycerol 3-phosphoethanolamine	-0.621053	0.0540982
s__Escherichia coli	sn-Glycerol 3-phosphoethanolamine	-0.655639	0.0445244
s__Petrimonas sp. IBARAKI	1-methyl-l-histidine	0.745865	0.0257038
s__Bacteroidia bacterium 43-41	1-methyl-l-histidine	0.657143	0.0445244
s__Flavobacterium columnare	1-methyl-l-histidine	-0.610526	0.0562814
s__Flavobacterium marinum	1-methyl-l-histidine	-0.640602	0.0488179
s__Anaerolineaceae bacterium oral taxon 439	1-methyl-l-histidine	0.715789	0.0338504
s__Staphylococcus sciuri	1-methyl-l-histidine	0.679699	0.0428641
s__Streptococcus orisratti	1-methyl-l-histidine	0.631579	0.0510674
s__Peptostreptococcus sp. D1	1-methyl-l-histidine	0.806015	0.0178751
s__Escherichia coli	1-methyl-l-histidine	0.658647	0.0445244
s__Petrimonas sp. IBARAKI	1-Methylhistidine	0.670677	0.0435387
s__Chryseobacterium chaponense	1-Methylhistidine	-0.643609	0.0479653
s__Chryseobacterium hominis	1-Methylhistidine	-0.625564	0.0526739
s__Flavobacterium marinum	1-Methylhistidine	-0.645113	0.0475707
s__Anaerolineaceae bacterium oral taxon 439	1-Methylhistidine	0.666165	0.0435387
s__Staphylococcus sciuri	1-Methylhistidine	0.756391	0.023793
s__Globicatella sulfidifaciens	1-Methylhistidine	0.618045	0.0546479
s__Streptococcus orisratti	1-Methylhistidine	0.613534	0.0555135
s__Peptostreptococcus sp. D1	1-Methylhistidine	0.61203	0.0559877
s__Escherichia coli	1-Methylhistidine	0.723308	0.0318655
s__Petrimonas sp. IBARAKI	2'-deoxycytidine	-0.688722	0.0425027
s__Bacteroidia bacterium 43-41	2'-deoxycytidine	-0.664662	0.0435387
s__Chryseobacterium chaponense	2'-deoxycytidine	0.606015	0.0582589
s__Flavobacterium ummariense	2'-deoxycytidine	0.603008	0.0595897
s__Anaerolineaceae bacterium oral taxon 439	2'-deoxycytidine	-0.738346	0.0285954
s__Staphylococcus sciuri	2'-deoxycytidine	-0.643609	0.0479653
s__Kocuria sp. ZOR0020	4-pyridoxic acid	0.649624	0.0456472
s__Staphylococcus sciuri	4-pyridoxic acid	0.666165	0.0435387
s__Staphylococcus sciuri	Salicylic acid	0.717293	0.0328525
s__Peptostreptococcus sp. D1	Salicylic acid	0.643609	0.0479653
s__Escherichia coli	Salicylic acid	0.613534	0.0555135
s__Actinobacillus seminis	Salicylic acid	0.676692	0.0432091
s__Streptococcus orisratti	Creatinine	-0.667669	0.0435387
s__Corynebacterium pollutisoli	Betaine	0.771429	0.0232986
s__Corynebacterium sp. Marseille-P4122	Betaine	0.762406	0.023793
s__Corynebacterium xerosis	Betaine	0.757895	0.023793
s__Brachybacterium muris	Betaine	0.723308	0.0318655
s__Kocuria sp. WRN011	Betaine	0.652632	0.0454853
s__Kocuria sp. ZOR0020	Betaine	0.621053	0.0540982
s__Tessaracoccus massiliensis	Betaine	0.688722	0.0425027
s__Staphylococcus sciuri	Betaine	0.792481	0.0194564
s__Globicatella sulfidifaciens	Betaine	0.726316	0.0318655
s__Helcococcus kunzii	Betaine	0.675188	0.0435387
s__Helcococcus sueciensis	Betaine	0.606015	0.0582589
s__Escherichia coli	Betaine	0.606015	0.0582589
s__Actinobacillus seminis	Betaine	0.666165	0.0435387
s__Moraxella pluranimalium	Betaine	0.637594	0.0500164
s__Petrimonas sp. IBARAKI	Glycerophosphocholine	-0.651128	0.0456223
s__Anaerolineaceae bacterium oral taxon 439	Glycerophosphocholine	-0.618045	0.0546479
s__Petrimonas sp. IBARAKI	5-aminovaleric acid	0.637594	0.0500164
s__Chryseobacterium bovis	5-aminovaleric acid	-0.630075	0.0510674
s__Chryseobacterium sp. 39-10	5-aminovaleric acid	-0.615038	0.0546479
s__Cruoricaptor ignavus	5-aminovaleric acid	-0.691729	0.0425027
s__Elizabethkingia anophelis	5-aminovaleric acid	-0.622556	0.0536422
s__Flavobacterium columnare	5-aminovaleric acid	-0.604511	0.0588196
s__Flavobacterium marinum	5-aminovaleric acid	-0.618045	0.0546479
s__Flavobacteriaceae bacterium 3519-10	5-aminovaleric acid	-0.603008	0.0595897
s__Anaerolineaceae bacterium oral taxon 439	5-aminovaleric acid	0.669173	0.0435387
s__Staphylococcus sciuri	5-aminovaleric acid	0.72782	0.0318655
s__Actinobacillus seminis	5-aminovaleric acid	0.780451	0.0217121
s__Streptococcus orisratti	Histamine	0.669173	0.0435387
s__Corynebacterium pollutisoli	Malonic acid	0.619549	0.0542434
s__Brachybacterium muris	Malonic acid	0.619549	0.0542434
s__Kocuria sp. ZOR0020	Malonic acid	0.630075	0.0510674
s__Nigerium massiliense	Malonic acid	0.613534	0.0555135
s__Tessaracoccus massiliensis	Malonic acid	0.610526	0.0562814
s__Staphylococcus sciuri	Malonic acid	0.735338	0.0286116
s__Globicatella sulfidifaciens	Malonic acid	0.627068	0.0516951
s__Helcococcus kunzii	Malonic acid	0.673684	0.0435387
s__Helcococcus sueciensis	Malonic acid	0.663158	0.0441249
s__Escherichia coli	Malonic acid	0.610526	0.0562814
s__Actinobacillus minor	Malonic acid	0.66015	0.0445244
s__Actinobacillus seminis	Malonic acid	0.759398	0.023793
s__Moraxella pluranimalium	Malonic acid	0.64812	0.0468484
s__Petrimonas sp. IBARAKI	Ketoleucine	-0.621053	0.0540982
s__Anaerolineaceae bacterium oral taxon 439	Ketoleucine	-0.655639	0.0445244
s__Streptococcus orisratti	Ketoleucine	-0.618045	0.0546479
s__Flavobacterium marinum	Sarcosine	-0.642105	0.0487959
s__Staphylococcus sciuri	Sarcosine	0.697744	0.040564
s__Globicatella sulfidifaciens	Sarcosine	0.625564	0.0526739
s__Escherichia coli	Sarcosine	0.634586	0.0502498
s__Staphylococcus sciuri	PC(16:0/16:0)	0.655639	0.0445244
s__Streptococcus orisratti	PC(16:0/16:0)	0.613534	0.0555135
s__Escherichia coli	PC(16:0/16:0)	0.604511	0.0588196
s__Petrimonas sp. IBARAKI	Niacinamide	-0.637594	0.0500164
s__Anaerolineaceae bacterium oral taxon 439	Niacinamide	-0.630075	0.0510674
s__Streptococcus orisratti	Niacinamide	-0.688722	0.0425027
s__Petrimonas sp. IBARAKI	Uracil	-0.628571	0.051311
s__Elizabethkingia anophelis	Uracil	0.630075	0.0510674
s__Flavobacterium columnare	Uracil	0.664662	0.0435387
s__Flavobacterium marinum	Uracil	0.609023	0.0570898
s__Anaerolineaceae bacterium oral taxon 439	Uracil	-0.631579	0.0510674
s__Staphylococcus sciuri	Uracil	-0.613534	0.0555135
s__Streptococcus orisratti	Uracil	-0.724812	0.0318655
s__Peptostreptococcus sp. D1	Uracil	-0.616541	0.0546479
s__Escherichia coli	Uracil	-0.651128	0.0456223
s__Actinobacillus seminis	Uracil	-0.777444	0.0217336
s__Corynebacterium pollutisoli	Phenylalanine	-0.699248	0.0397083
s__Corynebacterium sp. Marseille-P4122	Phenylalanine	-0.756391	0.023793
s__Corynebacterium xerosis	Phenylalanine	-0.745865	0.0257038
s__Brachybacterium muris	Phenylalanine	-0.646617	0.0474868
s__Kocuria sp. WRN011	Phenylalanine	-0.615038	0.0546479
s__Kocuria sp. ZOR0020	Phenylalanine	-0.627068	0.0516951
s__Staphylococcus sciuri	Phenylalanine	-0.723308	0.0318655
s__Globicatella sulfidifaciens	Phenylalanine	-0.661654	0.0445244
s__Streptococcus orisratti	Phenylalanine	-0.609023	0.0570898
s__Escherichia coli	Phenylalanine	-0.661654	0.0445244
s__Corynebacterium pollutisoli	L-aspartic acid	-0.62406	0.0527503
s__Corynebacterium sp. Marseille-P4122	L-aspartic acid	-0.649624	0.0456472
s__Corynebacterium xerosis	L-aspartic acid	-0.63609	0.0502498
s__Staphylococcus sciuri	L-aspartic acid	-0.721805	0.032093
s__Globicatella sulfidifaciens	L-aspartic acid	-0.601504	0.0601824
s__Streptococcus orisratti	L-aspartic acid	-0.649624	0.0456472
s__Escherichia coli	L-aspartic acid	-0.688722	0.0425027
s__Actinobacillus seminis	L-aspartic acid	-0.616541	0.0546479
s__Staphylococcus sciuri	Glutamic acid	-0.691729	0.0425027
s__Streptococcus orisratti	Glutamic acid	-0.66015	0.0445244
s__Escherichia coli	Glutamic acid	-0.633083	0.0510674
s__Actinobacillus seminis	Glutamic acid	-0.669173	0.0435387
s__Moraxella pluranimalium	Glutamic acid	-0.613534	0.0555135
s__Corynebacterium matruchotii	L-thiocitrulline	0.649624	0.0456472
s__Corynebacterium mustelae	L-thiocitrulline	0.634586	0.0502498
s__Petrimonas sp. IBARAKI	L-thiocitrulline	0.741353	0.0271069
s__Tannerella forsythia	L-thiocitrulline	0.679699	0.0428641
s__Bacteroidia bacterium 43-41	L-thiocitrulline	0.654135	0.0447664
s__Chryseobacterium antarcticum	L-thiocitrulline	-0.654135	0.0447664
s__Chryseobacterium bovis	L-thiocitrulline	-0.66015	0.0445244
s__Chryseobacterium chaponense	L-thiocitrulline	-0.708271	0.03571
s__Chryseobacterium haifense	L-thiocitrulline	-0.655639	0.0445244
s__Chryseobacterium hominis	L-thiocitrulline	-0.700752	0.0395806
s__Chryseobacterium jeonii	L-thiocitrulline	-0.666165	0.0435387
s__Chryseobacterium koreense	L-thiocitrulline	-0.666165	0.0435387
s__Chryseobacterium sp. 39-10	L-thiocitrulline	-0.67218	0.0435387
s__Chryseobacterium sp. FF12	L-thiocitrulline	-0.651128	0.0456223
s__Chryseobacterium sp. FH1	L-thiocitrulline	-0.670677	0.0435387
s__Chryseobacterium sp. VAUSW3	L-thiocitrulline	-0.604511	0.0588196
s__Cloacibacterium normanense	L-thiocitrulline	-0.631579	0.0510674
s__Elizabethkingia anophelis	L-thiocitrulline	-0.664662	0.0435387
s__Flavobacterium columnare	L-thiocitrulline	-0.619549	0.0542434
s__Flavobacterium marinum	L-thiocitrulline	-0.67218	0.0435387
s__Flavobacterium ummariense	L-thiocitrulline	-0.67218	0.0435387
s__Soonwooa buanensis	L-thiocitrulline	-0.684211	0.0428641
s__Flavobacteriaceae bacterium 3519-10	L-thiocitrulline	-0.649624	0.0456472
s__Flavobacteriaceae bacterium JJC	L-thiocitrulline	-0.615038	0.0546479
s__Chlamydia trachomatis	L-thiocitrulline	0.690226	0.0425027
s__Anaerolineaceae bacterium oral taxon 439	L-thiocitrulline	0.724812	0.0318655
s__Staphylococcus sciuri	L-thiocitrulline	0.724812	0.0318655
s__Streptococcus orisratti	L-thiocitrulline	0.721805	0.032093
s__Peptostreptococcus sp. D1	L-thiocitrulline	0.804511	0.0178751
s__Escherichia coli	L-thiocitrulline	0.685714	0.0428641
s__Corynebacterium matruchotii	Pro-hyp	-0.639098	0.0498146
s__Petrimonas sp. IBARAKI	Pro-hyp	-0.765414	0.023793
s__Bacteroidia bacterium 43-41	Pro-hyp	-0.684211	0.0428641
s__Chryseobacterium antarcticum	Pro-hyp	0.606015	0.0582589
s__Chryseobacterium bovis	Pro-hyp	0.645113	0.0475707
s__Chryseobacterium chaponense	Pro-hyp	0.681203	0.0428641
s__Chryseobacterium haifense	Pro-hyp	0.654135	0.0447664
s__Chryseobacterium hominis	Pro-hyp	0.676692	0.0432091
s__Chryseobacterium indologenes	Pro-hyp	0.634586	0.0502498
s__Chryseobacterium jeonii	Pro-hyp	0.640602	0.0488179
s__Chryseobacterium koreense	Pro-hyp	0.621053	0.0540982
s__Chryseobacterium sp. 39-10	Pro-hyp	0.658647	0.0445244
s__Chryseobacterium sp. FF12	Pro-hyp	0.634586	0.0502498
s__Chryseobacterium sp. FH1	Pro-hyp	0.616541	0.0546479
s__Chryseobacterium taklimakanense	Pro-hyp	0.640602	0.0488179
s__Cloacibacterium normanense	Pro-hyp	0.601504	0.0601824
s__Cruoricaptor ignavus	Pro-hyp	0.630075	0.0510674
s__Elizabethkingia anophelis	Pro-hyp	0.657143	0.0445244
s__Flavobacterium marinum	Pro-hyp	0.610526	0.0562814
s__Flavobacterium ummariense	Pro-hyp	0.654135	0.0447664
s__Soonwooa buanensis	Pro-hyp	0.640602	0.0488179
s__Flavobacteriaceae bacterium 3519-10	Pro-hyp	0.634586	0.0502498
s__Flavobacteriaceae bacterium JJC	Pro-hyp	0.607519	0.0579129
s__Anaerolineaceae bacterium oral taxon 439	Pro-hyp	-0.789474	0.0198817
s__Staphylococcus sciuri	Pro-hyp	-0.637594	0.0500164
s__Streptococcus orisratti	Pro-hyp	-0.664662	0.0435387
s__Peptostreptococcus sp. D1	Pro-hyp	-0.696241	0.0410927
s__Escherichia coli	Pro-hyp	-0.720301	0.032093
s__Corynebacterium matruchotii	1-(1z-octadecenyl)-sn-glycero-3-phosphocholine	-0.604511	0.0588196
s__Kocuria sp. ZOR0020	1-(1z-octadecenyl)-sn-glycero-3-phosphocholine	-0.62406	0.0527503
s__Petrimonas sp. IBARAKI	1-(1z-octadecenyl)-sn-glycero-3-phosphocholine	-0.837594	0.0139172
s__Bacteroidia bacterium 43-41	1-(1z-octadecenyl)-sn-glycero-3-phosphocholine	-0.778947	0.0217121
s__Flavobacterium columnare	1-(1z-octadecenyl)-sn-glycero-3-phosphocholine	0.619549	0.0542434
s__Flavobacterium marinum	1-(1z-octadecenyl)-sn-glycero-3-phosphocholine	0.709774	0.03571
s__Anaerolineaceae bacterium oral taxon 439	1-(1z-octadecenyl)-sn-glycero-3-phosphocholine	-0.760902	0.023793
s__Staphylococcus sciuri	1-(1z-octadecenyl)-sn-glycero-3-phosphocholine	-0.772932	0.0231382
s__Streptococcus orisratti	1-(1z-octadecenyl)-sn-glycero-3-phosphocholine	-0.744361	0.0257038
s__Escherichia coli	1-(1z-octadecenyl)-sn-glycero-3-phosphocholine	-0.735338	0.0286116
s__Kocuria sp. ZOR0020	1-hexadecanoyl-2-octadecadienoyl-sn-glycero-3-phosphocholine	0.603008	0.0595897
s__Staphylococcus sciuri	1-hexadecanoyl-2-octadecadienoyl-sn-glycero-3-phosphocholine	0.723308	0.0318655
s__Streptococcus orisratti	1-hexadecanoyl-2-octadecadienoyl-sn-glycero-3-phosphocholine	0.736842	0.0286116
s__Escherichia coli	1-hexadecanoyl-2-octadecadienoyl-sn-glycero-3-phosphocholine	0.747368	0.0257038
s__Actinobacillus seminis	1-hexadecanoyl-2-octadecadienoyl-sn-glycero-3-phosphocholine	0.616541	0.0546479
s__Moraxella pluranimalium	1-hexadecanoyl-2-octadecadienoyl-sn-glycero-3-phosphocholine	0.603008	0.0595897
s__Kocuria sp. ZOR0020	2-oleoyl-1-palmitoyl-sn-glycero-3-phosphocholine	0.649624	0.0456472
s__Petrimonas sp. IBARAKI	2-oleoyl-1-palmitoyl-sn-glycero-3-phosphocholine	0.601504	0.0601824
s__Chlamydia trachomatis	2-oleoyl-1-palmitoyl-sn-glycero-3-phosphocholine	0.66015	0.0445244
s__Staphylococcus sciuri	2-oleoyl-1-palmitoyl-sn-glycero-3-phosphocholine	0.825564	0.0139172
s__Globicatella sulfidifaciens	2-oleoyl-1-palmitoyl-sn-glycero-3-phosphocholine	0.606015	0.0582589
s__Streptococcus orisratti	2-oleoyl-1-palmitoyl-sn-glycero-3-phosphocholine	0.76391	0.023793
s__Escherichia coli	2-oleoyl-1-palmitoyl-sn-glycero-3-phosphocholine	0.75188	0.0254425
s__Moraxella pluranimalium	2-oleoyl-1-palmitoyl-sn-glycero-3-phosphocholine	0.607519	0.0579129
s__Kocuria sp. ZOR0020	Thioetheramide-PC	0.649624	0.0456472
s__Anaerolineaceae bacterium oral taxon 439	Thioetheramide-PC	0.604511	0.0588196
s__Staphylococcus sciuri	Thioetheramide-PC	0.666165	0.0435387
s__Streptococcus orisratti	Thioetheramide-PC	0.673684	0.0435387
s__Escherichia coli	Thioetheramide-PC	0.628571	0.051311
s__Kocuria sp. ZOR0020	1-o-hexadecyl-2-deoxy-2-thio-s-acetyl-sn-glyceryl-3-phosphorylcholine	0.607519	0.0579129
s__Petrimonas sp. IBARAKI	1-o-hexadecyl-2-deoxy-2-thio-s-acetyl-sn-glyceryl-3-phosphorylcholine	0.639098	0.0498146
s__Anaerolineaceae bacterium oral taxon 439	1-o-hexadecyl-2-deoxy-2-thio-s-acetyl-sn-glyceryl-3-phosphorylcholine	0.607519	0.0579129
s__Staphylococcus sciuri	1-o-hexadecyl-2-deoxy-2-thio-s-acetyl-sn-glyceryl-3-phosphorylcholine	0.729323	0.0314703
s__Streptococcus orisratti	1-o-hexadecyl-2-deoxy-2-thio-s-acetyl-sn-glyceryl-3-phosphorylcholine	0.684211	0.0428641
s__Escherichia coli	1-o-hexadecyl-2-deoxy-2-thio-s-acetyl-sn-glyceryl-3-phosphorylcholine	0.691729	0.0425027
s__Corynebacterium pollutisoli	1-oleoyl-2-myristoyl-sn-glycero-3-phosphocholine	0.66015	0.0445244
s__Corynebacterium sp. Marseille-P4122	1-oleoyl-2-myristoyl-sn-glycero-3-phosphocholine	0.627068	0.0516951
s__Corynebacterium xerosis	1-oleoyl-2-myristoyl-sn-glycero-3-phosphocholine	0.616541	0.0546479
s__Brachybacterium muris	1-oleoyl-2-myristoyl-sn-glycero-3-phosphocholine	0.651128	0.0456223
s__Kocuria sp. WRN011	1-oleoyl-2-myristoyl-sn-glycero-3-phosphocholine	0.633083	0.0510674
s__Kocuria sp. ZOR0020	1-oleoyl-2-myristoyl-sn-glycero-3-phosphocholine	0.703759	0.0379703
s__Chlamydia trachomatis	1-oleoyl-2-myristoyl-sn-glycero-3-phosphocholine	0.615038	0.0546479
s__Staphylococcus sciuri	1-oleoyl-2-myristoyl-sn-glycero-3-phosphocholine	0.857143	0.0104196
s__Globicatella sulfidifaciens	1-oleoyl-2-myristoyl-sn-glycero-3-phosphocholine	0.681203	0.0428641
s__Streptococcus orisratti	1-oleoyl-2-myristoyl-sn-glycero-3-phosphocholine	0.678195	0.0428641
s__Helcococcus kunzii	1-oleoyl-2-myristoyl-sn-glycero-3-phosphocholine	0.621053	0.0540982
s__Escherichia coli	1-oleoyl-2-myristoyl-sn-glycero-3-phosphocholine	0.657143	0.0445244
s__Actinobacillus seminis	1-oleoyl-2-myristoyl-sn-glycero-3-phosphocholine	0.655639	0.0445244
s__Moraxella pluranimalium	1-oleoyl-2-myristoyl-sn-glycero-3-phosphocholine	0.682707	0.0428641
s__Petrimonas sp. IBARAKI	1-hexadecyl-sn-glycero-3-phosphocholine	-0.735338	0.0286116
s__Tannerella forsythia	1-hexadecyl-sn-glycero-3-phosphocholine	-0.622556	0.0536422
s__Bacteroidia bacterium 43-41	1-hexadecyl-sn-glycero-3-phosphocholine	-0.657143	0.0445244
s__Chryseobacterium bovis	1-hexadecyl-sn-glycero-3-phosphocholine	0.634586	0.0502498
s__Chryseobacterium chaponense	1-hexadecyl-sn-glycero-3-phosphocholine	0.622556	0.0536422
s__Chryseobacterium haifense	1-hexadecyl-sn-glycero-3-phosphocholine	0.609023	0.0570898
s__Chryseobacterium hominis	1-hexadecyl-sn-glycero-3-phosphocholine	0.655639	0.0445244
s__Chryseobacterium jeonii	1-hexadecyl-sn-glycero-3-phosphocholine	0.61203	0.0559877
s__Chryseobacterium sp. 39-10	1-hexadecyl-sn-glycero-3-phosphocholine	0.607519	0.0579129
s__Chryseobacterium sp. FF12	1-hexadecyl-sn-glycero-3-phosphocholine	0.655639	0.0445244
s__Chryseobacterium sp. FH1	1-hexadecyl-sn-glycero-3-phosphocholine	0.649624	0.0456472
s__Chryseobacterium taklimakanense	1-hexadecyl-sn-glycero-3-phosphocholine	0.603008	0.0595897
s__Elizabethkingia anophelis	1-hexadecyl-sn-glycero-3-phosphocholine	0.616541	0.0546479
s__Flavobacterium columnare	1-hexadecyl-sn-glycero-3-phosphocholine	0.615038	0.0546479
s__Flavobacterium marinum	1-hexadecyl-sn-glycero-3-phosphocholine	0.663158	0.0441249
s__Soonwooa buanensis	1-hexadecyl-sn-glycero-3-phosphocholine	0.654135	0.0447664
s__Anaerolineaceae bacterium oral taxon 439	1-hexadecyl-sn-glycero-3-phosphocholine	-0.735338	0.0286116
s__Streptococcus orisratti	1-hexadecyl-sn-glycero-3-phosphocholine	-0.627068	0.0516951
s__Cardiobacterium hominis	1-hexadecyl-sn-glycero-3-phosphocholine	-0.62406	0.0527503
s__Escherichia coli	1-hexadecyl-sn-glycero-3-phosphocholine	-0.61203	0.0559877
s__Actinobacillus seminis	1-hexadecyl-sn-glycero-3-phosphocholine	-0.62406	0.0527503
s__Corynebacterium pollutisoli	Valine betaine	0.609023	0.0570898
s__Flavobacterium columnare	Valine betaine	-0.625564	0.0526739
s__Flavobacterium marinum	Valine betaine	-0.607519	0.0579129
s__Staphylococcus sciuri	Valine betaine	0.706767	0.036443
s__Globicatella sulfidifaciens	Valine betaine	0.609023	0.0570898
s__Peptostreptococcus sp. D1	Valine betaine	0.685714	0.0428641
s__Helcococcus kunzii	Valine betaine	0.654135	0.0447664
s__Escherichia coli	Valine betaine	0.654135	0.0447664
s__Actinobacillus seminis	Valine betaine	0.810526	0.0178751
s__Corynebacterium pollutisoli	N-(aminothioxomethyl)-5-oxo-1-propyl-2-pyrrolidineacetamide	-0.718797	0.0326578
s__Corynebacterium sp. Marseille-P4122	N-(aminothioxomethyl)-5-oxo-1-propyl-2-pyrrolidineacetamide	-0.708271	0.03571
s__Corynebacterium xerosis	N-(aminothioxomethyl)-5-oxo-1-propyl-2-pyrrolidineacetamide	-0.712782	0.0351267
s__Brachybacterium muris	N-(aminothioxomethyl)-5-oxo-1-propyl-2-pyrrolidineacetamide	-0.661654	0.0445244
s__Kocuria sp. WRN011	N-(aminothioxomethyl)-5-oxo-1-propyl-2-pyrrolidineacetamide	-0.667669	0.0435387
s__Kocuria sp. ZOR0020	N-(aminothioxomethyl)-5-oxo-1-propyl-2-pyrrolidineacetamide	-0.62406	0.0527503
s__Staphylococcus sciuri	N-(aminothioxomethyl)-5-oxo-1-propyl-2-pyrrolidineacetamide	-0.77594	0.0218065
s__Globicatella sulfidifaciens	N-(aminothioxomethyl)-5-oxo-1-propyl-2-pyrrolidineacetamide	-0.661654	0.0445244
s__Streptococcus orisratti	N-(aminothioxomethyl)-5-oxo-1-propyl-2-pyrrolidineacetamide	-0.699248	0.0397083
s__Escherichia coli	N-(aminothioxomethyl)-5-oxo-1-propyl-2-pyrrolidineacetamide	-0.714286	0.0340907
s__Actinobacillus seminis	N-(aminothioxomethyl)-5-oxo-1-propyl-2-pyrrolidineacetamide	-0.757895	0.023793
s__Petrimonas sp. IBARAKI	Linoleic acid methyl ester	-0.621053	0.0540982
s__Anaerolineaceae bacterium oral taxon 439	Linoleic acid methyl ester	-0.658647	0.0445244
s__Staphylococcus sciuri	Linoleic acid methyl ester	-0.655639	0.0445244
s__Cardiobacterium hominis	Linoleic acid methyl ester	-0.664662	0.0435387
s__Escherichia coli	Linoleic acid methyl ester	-0.651128	0.0456223
s__Streptococcus orisratti	Pro-Glu	-0.732331	0.0297527
s__Escherichia coli	Pro-Glu	-0.768421	0.023793
s__Actinobacillus seminis	Pro-Glu	-0.658647	0.0445244
s__Staphylococcus sciuri	1-Palmitoyllysophosphatidylcholine	0.630075	0.0510674
s__Helcococcus sueciensis	1-Palmitoyllysophosphatidylcholine	0.625564	0.0526739
s__Escherichia coli	1-Palmitoyllysophosphatidylcholine	0.708271	0.03571
s__Actinobacillus seminis	1-Palmitoyllysophosphatidylcholine	0.63609	0.0502498
s__Moraxella pluranimalium	1-Palmitoyllysophosphatidylcholine	0.643609	0.0479653
s__Corynebacterium matruchotii	2,4,6-tri-tert-butylaniline	0.603008	0.0595897
s__Petrimonas sp. IBARAKI	2,4,6-tri-tert-butylaniline	0.720301	0.032093
s__Prevotella saccharolytica	2,4,6-tri-tert-butylaniline	0.610526	0.0562814
s__Bacteroidia bacterium 43-41	2,4,6-tri-tert-butylaniline	0.666165	0.0435387
s__Chryseobacterium chaponense	2,4,6-tri-tert-butylaniline	-0.66015	0.0445244
s__Chryseobacterium hominis	2,4,6-tri-tert-butylaniline	-0.631579	0.0510674
s__Chryseobacterium jeonii	2,4,6-tri-tert-butylaniline	-0.628571	0.051311
s__Chryseobacterium sp. 39-10	2,4,6-tri-tert-butylaniline	-0.61203	0.0559877
s__Chryseobacterium sp. FF12	2,4,6-tri-tert-butylaniline	-0.621053	0.0540982
s__Soonwooa buanensis	2,4,6-tri-tert-butylaniline	-0.640602	0.0488179
s__Flavobacteriaceae bacterium JJC	2,4,6-tri-tert-butylaniline	-0.604511	0.0588196
s__Anaerolineaceae bacterium oral taxon 439	2,4,6-tri-tert-butylaniline	0.780451	0.0217121
s__Staphylococcus sciuri	2,4,6-tri-tert-butylaniline	0.63609	0.0502498
s__Peptostreptococcus sp. D1	2,4,6-tri-tert-butylaniline	0.678195	0.0428641
s__Corynebacterium pollutisoli	D-glucosamine, 6-sulfate	0.643609	0.0479653
s__Corynebacterium xerosis	D-glucosamine, 6-sulfate	0.616541	0.0546479
s__Brachybacterium muris	D-glucosamine, 6-sulfate	0.651128	0.0456223
s__Kocuria sp. ZOR0020	D-glucosamine, 6-sulfate	0.601504	0.0601824
s__Tessaracoccus massiliensis	D-glucosamine, 6-sulfate	0.631579	0.0510674
s__Staphylococcus sciuri	D-glucosamine, 6-sulfate	0.697744	0.040564
s__Globicatella sulfidifaciens	D-glucosamine, 6-sulfate	0.62406	0.0527503
s__Escherichia coli	D-glucosamine, 6-sulfate	0.652632	0.0454853
s__Actinobacillus seminis	D-glucosamine, 6-sulfate	0.634586	0.0502498
s__Kocuria sp. ZOR0020	Arachidonoylthiophosphorylcholine	0.619549	0.0542434
s__Staphylococcus sciuri	Arachidonoylthiophosphorylcholine	0.645113	0.0475707
s__Streptococcus orisratti	Arachidonoylthiophosphorylcholine	0.691729	0.0425027
s__Corynebacterium matruchotii	Pro-leu	-0.628571	0.051311
s__Petrimonas sp. IBARAKI	Pro-leu	-0.62406	0.0527503
s__Chryseobacterium bovis	Pro-leu	0.631579	0.0510674
s__Chryseobacterium chaponense	Pro-leu	0.627068	0.0516951
s__Chryseobacterium haifense	Pro-leu	0.646617	0.0474868
s__Chryseobacterium hominis	Pro-leu	0.673684	0.0435387
s__Chryseobacterium sp. 39-10	Pro-leu	0.610526	0.0562814
s__Chryseobacterium sp. FH1	Pro-leu	0.663158	0.0441249
s__Chryseobacterium taklimakanense	Pro-leu	0.655639	0.0445244
s__Elizabethkingia anophelis	Pro-leu	0.616541	0.0546479
s__Flavobacterium columnare	Pro-leu	0.642105	0.0487959
s__Flavobacterium marinum	Pro-leu	0.613534	0.0555135
s__Anaerolineaceae bacterium oral taxon 439	Pro-leu	-0.676692	0.0432091
s__Streptococcus orisratti	Pro-leu	-0.658647	0.0445244
s__Peptostreptococcus sp. D1	Pro-leu	-0.676692	0.0432091
s__Escherichia coli	Pro-leu	-0.714286	0.0340907
s__Actinobacillus seminis	Pro-leu	-0.664662	0.0435387
s__Staphylococcus sciuri	1-heptadecanoyl-sn-glycero-3-phosphocholine	0.627068	0.0516951
s__Escherichia coli	1-heptadecanoyl-sn-glycero-3-phosphocholine	0.679699	0.0428641
s__Moraxella pluranimalium	1-heptadecanoyl-sn-glycero-3-phosphocholine	0.606015	0.0582589
s__Streptococcus orisratti	Lys-Trp-Arg	-0.627068	0.0516951
s__Escherichia coli	Lys-Trp-Arg	-0.720301	0.032093
s__Actinobacillus seminis	Lys-Trp-Arg	-0.742857	0.0263949
s__Moraxella pluranimalium	Lys-Trp-Arg	-0.606015	0.0582589
s__Staphylococcus sciuri	Lys-Gly	-0.616541	0.0546479
s__Streptococcus orisratti	Lys-Gly	-0.681203	0.0428641
s__Escherichia coli	Lys-Gly	-0.685714	0.0428641
s__Actinobacillus seminis	Lys-Gly	-0.75188	0.0254425
s__Moraxella pluranimalium	Lys-Gly	-0.708271	0.03571
s__Helcococcus sueciensis	1-pentadecanoyl-sn-glycero-3-phosphocholine	0.646617	0.0474868
s__Escherichia coli	1-pentadecanoyl-sn-glycero-3-phosphocholine	0.618045	0.0546479
s__Actinobacillus minor	1-pentadecanoyl-sn-glycero-3-phosphocholine	0.619549	0.0542434
s__Actinobacillus seminis	1-pentadecanoyl-sn-glycero-3-phosphocholine	0.615038	0.0546479
s__Moraxella pluranimalium	1-pentadecanoyl-sn-glycero-3-phosphocholine	0.679699	0.0428641
s__Escherichia coli	Stearoylcarnitine	-0.606015	0.0582589
s__Actinobacillus minor	Stearoylcarnitine	-0.733835	0.0294187
s__Actinobacillus seminis	Stearoylcarnitine	-0.759398	0.023793
s__Streptococcus orisratti	Arg-Ala	0.675188	0.0435387
s__Streptococcus orisratti	Asn-Gly-Lys	-0.61203	0.0559877
s__Cardiobacterium hominis	L-propionylcarnitine	0.609023	0.0570898
s__Prevotella intermedia	5-methoxymethylone	-0.603008	0.0595897
s__Prevotella sp. HUN102	5-methoxymethylone	-0.658647	0.0445244
s__Chryseobacterium sp. FF12	5-methoxymethylone	0.604511	0.0588196
s__Streptococcus orisratti	Methyl 2-octynoate	-0.615038	0.0546479
s__Staphylococcus sciuri	Lys-Phe-Lys	-0.619549	0.0542434
s__Staphylococcus sciuri	1-o-hexadecyl-2-o-(2e-butenoyl)-sn-glyceryl-3-phosphocholine	0.610526	0.0562814
s__Peptostreptococcus sp. D1	1-palmitoyl-2-linoleoyl-sn-glycero-3-phosphocholine	0.615038	0.0546479
s__Actinobacillus seminis	Enrofloxacin	-0.67218	0.0435387
s__Petrimonas sp. IBARAKI	Gln-glu	-0.652632	0.0454853
s__Anaerolineaceae bacterium oral taxon 439	Gln-glu	-0.651128	0.0456223
s__Staphylococcus sciuri	Gln-glu	-0.640602	0.0488179
s__Streptococcus orisratti	Gln-glu	-0.627068	0.0516951
s__Escherichia coli	Gln-glu	-0.723308	0.0318655
s__Staphylococcus sciuri	Pc(16:1e/9-hode)	0.687218	0.0428641
s__Streptococcus orisratti	Pc(16:1e/9-hode)	0.708271	0.03571
s__Escherichia coli	Pc(16:1e/9-hode)	0.708271	0.03571
s__Actinobacillus seminis	Pc(16:1e/9-hode)	0.601504	0.0601824
s__Moraxella pluranimalium	Pc(16:1e/9-hode)	0.688722	0.0425027
s__Petrimonas sp. IBARAKI	(r)-2-hydroxystearic acid	-0.753383	0.0254425
s__Tannerella forsythia	(r)-2-hydroxystearic acid	-0.615038	0.0546479
s__Bacteroidia bacterium 43-41	(r)-2-hydroxystearic acid	-0.673684	0.0435387
s__Chryseobacterium antarcticum	(r)-2-hydroxystearic acid	0.601504	0.0601824
s__Chryseobacterium bovis	(r)-2-hydroxystearic acid	0.678195	0.0428641
s__Chryseobacterium chaponense	(r)-2-hydroxystearic acid	0.723308	0.0318655
s__Chryseobacterium haifense	(r)-2-hydroxystearic acid	0.667669	0.0435387
s__Chryseobacterium hominis	(r)-2-hydroxystearic acid	0.717293	0.0328525
s__Chryseobacterium jeonii	(r)-2-hydroxystearic acid	0.652632	0.0454853
s__Chryseobacterium koreense	(r)-2-hydroxystearic acid	0.631579	0.0510674
s__Chryseobacterium sp. 39-10	(r)-2-hydroxystearic acid	0.678195	0.0428641
s__Chryseobacterium sp. FF12	(r)-2-hydroxystearic acid	0.703759	0.0379703
s__Chryseobacterium sp. FH1	(r)-2-hydroxystearic acid	0.634586	0.0502498
s__Chryseobacterium taklimakanense	(r)-2-hydroxystearic acid	0.64812	0.0468484
s__Cloacibacterium normanense	(r)-2-hydroxystearic acid	0.619549	0.0542434
s__Cruoricaptor ignavus	(r)-2-hydroxystearic acid	0.670677	0.0435387
s__Elizabethkingia anophelis	(r)-2-hydroxystearic acid	0.643609	0.0479653
s__Flavobacterium marinum	(r)-2-hydroxystearic acid	0.628571	0.051311
s__Flavobacterium ummariense	(r)-2-hydroxystearic acid	0.640602	0.0488179
s__Soonwooa buanensis	(r)-2-hydroxystearic acid	0.700752	0.0395806
s__Flavobacteriaceae bacterium 3519-10	(r)-2-hydroxystearic acid	0.645113	0.0475707
s__Flavobacteriaceae bacterium JJC	(r)-2-hydroxystearic acid	0.601504	0.0601824
s__Anaerolineaceae bacterium oral taxon 439	(r)-2-hydroxystearic acid	-0.793985	0.0194564
s__Staphylococcus sciuri	(r)-2-hydroxystearic acid	-0.718797	0.0326578
s__Streptococcus orisratti	(r)-2-hydroxystearic acid	-0.601504	0.0601824
s__Cardiobacterium hominis	(r)-2-hydroxystearic acid	-0.61203	0.0559877
s__Escherichia coli	(r)-2-hydroxystearic acid	-0.685714	0.0428641
s__Kocuria sp. ZOR0020	1-stearoyl-2-linoleoyl-sn-glycero-3-phosphoethanolamine	0.619549	0.0542434
s__Staphylococcus sciuri	1-stearoyl-2-linoleoyl-sn-glycero-3-phosphoethanolamine	0.66015	0.0445244
s__Streptococcus orisratti	1-stearoyl-2-linoleoyl-sn-glycero-3-phosphoethanolamine	0.694737	0.0419896
s__Escherichia coli	1-stearoyl-2-linoleoyl-sn-glycero-3-phosphoethanolamine	0.658647	0.0445244
s__Moraxella pluranimalium	1-stearoyl-2-linoleoyl-sn-glycero-3-phosphoethanolamine	0.649624	0.0456472
s__Petrimonas sp. IBARAKI	9(10)-epoxy-12z-octadecenoic acid	-0.615038	0.0546479
s__Anaerolineaceae bacterium oral taxon 439	9(10)-epoxy-12z-octadecenoic acid	-0.63609	0.0502498
s__Staphylococcus sciuri	9(10)-epoxy-12z-octadecenoic acid	-0.622556	0.0536422
s__Streptococcus orisratti	9(10)-epoxy-12z-octadecenoic acid	-0.639098	0.0498146
s__Escherichia coli	9(10)-epoxy-12z-octadecenoic acid	-0.643609	0.0479653
s__Actinobacillus seminis	9(10)-epoxy-12z-octadecenoic acid	-0.631579	0.0510674
s__Staphylococcus sciuri	Ile-Asp	-0.673684	0.0435387
s__Streptococcus orisratti	Ile-Asp	-0.618045	0.0546479
s__Escherichia coli	Ile-Asp	-0.745865	0.0257038
s__Actinobacillus seminis	Ile-Asp	-0.628571	0.051311
s__Moraxella pluranimalium	Ile-Asp	-0.607519	0.0579129
s__Corynebacterium pollutisoli	1h-indole-3-propanoic acid	0.615038	0.0546479
s__Brachybacterium muris	1h-indole-3-propanoic acid	0.637594	0.0500164
s__Kocuria sp. ZOR0020	1h-indole-3-propanoic acid	0.631579	0.0510674
s__Nigerium massiliense	1h-indole-3-propanoic acid	0.62406	0.0527503
s__Tessaracoccus massiliensis	1h-indole-3-propanoic acid	0.63609	0.0502498
s__Staphylococcus sciuri	1h-indole-3-propanoic acid	0.744361	0.0257038
s__Globicatella sulfidifaciens	1h-indole-3-propanoic acid	0.640602	0.0488179
s__Escherichia coli	1h-indole-3-propanoic acid	0.601504	0.0601824
s__Actinobacillus seminis	1h-indole-3-propanoic acid	0.681203	0.0428641
s__Moraxella pluranimalium	1h-indole-3-propanoic acid	0.630075	0.0510674
s__Petrimonas sp. IBARAKI	all cis-(6,9,12)-Linolenic acid	-0.618045	0.0546479
s__Flavobacterium marinum	all cis-(6,9,12)-Linolenic acid	0.615038	0.0546479
s__Staphylococcus sciuri	all cis-(6,9,12)-Linolenic acid	-0.690226	0.0425027
s__Streptococcus orisratti	all cis-(6,9,12)-Linolenic acid	-0.615038	0.0546479
s__Escherichia coli	all cis-(6,9,12)-Linolenic acid	-0.679699	0.0428641
s__Actinobacillus seminis	all cis-(6,9,12)-Linolenic acid	-0.637594	0.0500164
s__Streptococcus orisratti	Pc(18:1e/9-hode)	0.645113	0.0475707
s__Moraxella pluranimalium	Pc(18:1e/9-hode)	0.610526	0.0562814
s__Petrimonas sp. IBARAKI	Loxistatin acid	-0.645113	0.0475707
s__Bacteroidia bacterium 43-41	Loxistatin acid	-0.631579	0.0510674
s__Chlamydia trachomatis	Loxistatin acid	-0.651128	0.0456223
s__Anaerolineaceae bacterium oral taxon 439	Loxistatin acid	-0.666165	0.0435387
s__Staphylococcus sciuri	Loxistatin acid	-0.630075	0.0510674
s__Cardiobacterium hominis	Loxistatin acid	-0.637594	0.0500164
s__Petrimonas sp. IBARAKI	Hydroxyisocaproic acid	-0.759398	0.023793
s__Tannerella forsythia	Hydroxyisocaproic acid	-0.678195	0.0428641
s__Bacteroidia bacterium 43-41	Hydroxyisocaproic acid	-0.684211	0.0428641
s__Algoriella xinjiangensis	Hydroxyisocaproic acid	0.601504	0.0601824
s__Chryseobacterium antarcticum	Hydroxyisocaproic acid	0.62406	0.0527503
s__Chryseobacterium bovis	Hydroxyisocaproic acid	0.696241	0.0410927
s__Chryseobacterium chaponense	Hydroxyisocaproic acid	0.699248	0.0397083
s__Chryseobacterium haifense	Hydroxyisocaproic acid	0.646617	0.0474868
s__Chryseobacterium hominis	Hydroxyisocaproic acid	0.711278	0.03571
s__Chryseobacterium indologenes	Hydroxyisocaproic acid	0.627068	0.0516951
s__Chryseobacterium jeonii	Hydroxyisocaproic acid	0.628571	0.051311
s__Chryseobacterium koreense	Hydroxyisocaproic acid	0.619549	0.0542434
s__Chryseobacterium sp. 39-10	Hydroxyisocaproic acid	0.708271	0.03571
s__Chryseobacterium sp. FF12	Hydroxyisocaproic acid	0.655639	0.0445244
s__Chryseobacterium sp. FH1	Hydroxyisocaproic acid	0.645113	0.0475707
s__Chryseobacterium sp. SCN 40-13	Hydroxyisocaproic acid	0.622556	0.0536422
s__Chryseobacterium taklimakanense	Hydroxyisocaproic acid	0.645113	0.0475707
s__Cloacibacterium normanense	Hydroxyisocaproic acid	0.606015	0.0582589
s__Cruoricaptor ignavus	Hydroxyisocaproic acid	0.658647	0.0445244
s__Elizabethkingia anophelis	Hydroxyisocaproic acid	0.666165	0.0435387
s__Flavobacterium ummariense	Hydroxyisocaproic acid	0.669173	0.0435387
s__Soonwooa buanensis	Hydroxyisocaproic acid	0.681203	0.0428641
s__Flavobacteriaceae bacterium 3519-10	Hydroxyisocaproic acid	0.676692	0.0432091
s__Anaerolineaceae bacterium oral taxon 439	Hydroxyisocaproic acid	-0.801504	0.0180157
s__Streptococcus orisratti	PGF2a	-0.669173	0.0435387
s__Escherichia coli	PGF2a	-0.631579	0.0510674
s__Actinobacillus minor	Indoxyl sulfate	0.610526	0.0562814
s__Actinobacillus seminis	Indoxyl sulfate	0.655639	0.0445244
s__Kocuria sp. ZOR0020	3-ketofusidic acid	0.606015	0.0582589
s__Staphylococcus sciuri	3-ketofusidic acid	0.664662	0.0435387
s__Corynebacterium pollutisoli	3-hydroxyglutaric acid	-0.645113	0.0475707
s__Corynebacterium sp. Marseille-P4122	3-hydroxyglutaric acid	-0.720301	0.032093
s__Corynebacterium xerosis	3-hydroxyglutaric acid	-0.691729	0.0425027
s__Kocuria sp. ZOR0020	3-hydroxyglutaric acid	-0.639098	0.0498146
s__Staphylococcus sciuri	3-hydroxyglutaric acid	-0.700752	0.0395806
s__Globicatella sulfidifaciens	3-hydroxyglutaric acid	-0.606015	0.0582589
s__Escherichia coli	3-hydroxyglutaric acid	-0.658647	0.0445244
s__Staphylococcus sciuri	17,20-dimethylprostaglandin f1.alpha.	-0.610526	0.0562814
s__Brachymonas chironomi	17,20-dimethylprostaglandin f1.alpha.	0.62406	0.0527503
s__Brachymonas denitrificans	17,20-dimethylprostaglandin f1.alpha.	0.621053	0.0540982
s__Kocuria sp. ZOR0020	2-arachidonoyl-1-stearoyl-sn-glycero-3-phosphoethanolamine	0.658647	0.0445244
s__Staphylococcus sciuri	2-arachidonoyl-1-stearoyl-sn-glycero-3-phosphoethanolamine	0.610526	0.0562814
s__Petrimonas sp. IBARAKI	2-methyl-3-hydroxybutyric acid	-0.825564	0.0139172
s__Tannerella forsythia	2-methyl-3-hydroxybutyric acid	-0.687218	0.0428641
s__Bacteroidia bacterium 43-41	2-methyl-3-hydroxybutyric acid	-0.781955	0.0217121
s__Algoriella xinjiangensis	2-methyl-3-hydroxybutyric acid	0.666165	0.0435387
s__Chryseobacterium antarcticum	2-methyl-3-hydroxybutyric acid	0.609023	0.0570898
s__Chryseobacterium bovis	2-methyl-3-hydroxybutyric acid	0.664662	0.0435387
s__Chryseobacterium chaponense	2-methyl-3-hydroxybutyric acid	0.669173	0.0435387
s__Chryseobacterium hominis	2-methyl-3-hydroxybutyric acid	0.673684	0.0435387
s__Chryseobacterium indologenes	2-methyl-3-hydroxybutyric acid	0.633083	0.0510674
s__Chryseobacterium koreense	2-methyl-3-hydroxybutyric acid	0.616541	0.0546479
s__Chryseobacterium sp. 39-10	2-methyl-3-hydroxybutyric acid	0.687218	0.0428641
s__Chryseobacterium sp. FH1	2-methyl-3-hydroxybutyric acid	0.621053	0.0540982
s__Chryseobacterium sp. SCN 40-13	2-methyl-3-hydroxybutyric acid	0.634586	0.0502498
s__Chryseobacterium taklimakanense	2-methyl-3-hydroxybutyric acid	0.615038	0.0546479
s__Cruoricaptor ignavus	2-methyl-3-hydroxybutyric acid	0.673684	0.0435387
s__Elizabethkingia anophelis	2-methyl-3-hydroxybutyric acid	0.631579	0.0510674
s__Flavobacterium ummariense	2-methyl-3-hydroxybutyric acid	0.649624	0.0456472
s__Soonwooa buanensis	2-methyl-3-hydroxybutyric acid	0.618045	0.0546479
s__Flavobacteriaceae bacterium 3519-10	2-methyl-3-hydroxybutyric acid	0.670677	0.0435387
s__Anaerolineaceae bacterium oral taxon 439	2-methyl-3-hydroxybutyric acid	-0.809023	0.0178751
s__Kocuria sp. ZOR0020	1,2-dioleoyl-sn-glycero-3-phosphoethanolamine-n,n-dimethyl	0.604511	0.0588196
s__Staphylococcus sciuri	Methanone, [6-hydroxy-1-[2-(4-morpholinyl)ethyl]-1h-indol-3-yl]-1-naphthalenyl-	0.615038	0.0546479
s__Actinobacillus seminis	Methanone, [6-hydroxy-1-[2-(4-morpholinyl)ethyl]-1h-indol-3-yl]-1-naphthalenyl-	0.793985	0.0194564
s__Petrimonas sp. IBARAKI	1-(5z,8z,11z,14z-eicosatetraenoyl)-sn-glycero-3-phosphate	-0.688722	0.0425027
s__Bacteroidia bacterium 43-41	1-(5z,8z,11z,14z-eicosatetraenoyl)-sn-glycero-3-phosphate	-0.610526	0.0562814
s__Chryseobacterium hominis	1-(5z,8z,11z,14z-eicosatetraenoyl)-sn-glycero-3-phosphate	0.63609	0.0502498
s__Chryseobacterium sp. FH1	1-(5z,8z,11z,14z-eicosatetraenoyl)-sn-glycero-3-phosphate	0.637594	0.0500164
s__Chryseobacterium sp. VAUSW3	1-(5z,8z,11z,14z-eicosatetraenoyl)-sn-glycero-3-phosphate	0.631579	0.0510674
s__Soonwooa buanensis	1-(5z,8z,11z,14z-eicosatetraenoyl)-sn-glycero-3-phosphate	0.628571	0.051311
s__Anaerolineaceae bacterium oral taxon 439	1-(5z,8z,11z,14z-eicosatetraenoyl)-sn-glycero-3-phosphate	-0.669173	0.0435387
s__Streptococcus orisratti	1-(5z,8z,11z,14z-eicosatetraenoyl)-sn-glycero-3-phosphate	-0.61203	0.0559877
s__Peptostreptococcus sp. D1	1-(5z,8z,11z,14z-eicosatetraenoyl)-sn-glycero-3-phosphate	-0.658647	0.0445244
s__Flavobacterium marinum	2-hydroxymyristic acid	0.604511	0.0588196
s__Anaerolineaceae bacterium oral taxon 439	2-hydroxymyristic acid	-0.637594	0.0500164
s__Actinobacillus minor	2-hydroxymyristic acid	-0.618045	0.0546479
s__Actinobacillus seminis	2-hydroxymyristic acid	-0.640602	0.0488179
s__Staphylococcus sciuri	Pc(17:1/9-hode)	0.640602	0.0488179
s__Moraxella pluranimalium	Pc(17:1/9-hode)	0.642105	0.0487959

## Sheet: Table S21
Supplementary Table 21. Associations between significantly different salivary microbes and metabolites in Ma and Oa groups
Microbial species	Metabolites	Correlation coefficients	Corrected P-values
s__Prevotella intermedia	7-methylguanosine	-0.666165	0.0202007
s__Candidatus Gracilibacteria bacterium	7-methylguanosine	-0.664662	0.0202007
s__Prevotella intermedia	16-Hydroxypalmitic acid	-0.610526	0.037382
s__Prevotella saccharolytica	16-Hydroxypalmitic acid	-0.64812	0.0244601
s__Candidatus Gracilibacteria bacterium	16-Hydroxypalmitic acid	-0.732331	0.00857658
s__Peptostreptococcus sp. D1	16-Hydroxypalmitic acid	-0.640602	0.0258457
s__candidate division SR1 bacterium CG_4_9_14_3_um_filter_40_9	16-Hydroxypalmitic acid	-0.765414	0.00738195
s__candidate division SR1 bacterium RAAC1_SR1_1	16-Hydroxypalmitic acid	-0.73985	0.00769641
s__uncultured bacterium (gcode 4)	16-Hydroxypalmitic acid	-0.762406	0.00738195
s__Peptostreptococcus sp. D1	Anacardic acid	-0.818045	0.00336177
s__Candidatus Gracilibacteria bacterium	Stachydrine	-0.607519	0.037382
s__candidate division SR1 bacterium CG_4_9_14_3_um_filter_40_9	Stachydrine	-0.673684	0.0202007
s__candidate division SR1 bacterium RAAC1_SR1_1	Stachydrine	-0.690226	0.017289
s__uncultured bacterium (gcode 4)	Stachydrine	-0.664662	0.0202007
s__Peptostreptococcus sp. D1	Mitragynine	-0.643609	0.0251356
s__Peptostreptococcus sp. D1	Imidazole	0.726316	0.00920105
s__Peptostreptococcus sp. D1	Dl-lactate	0.75188	0.00738195
s__Prevotella intermedia	Creatinine	-0.616541	0.0367472
s__Candidatus Gracilibacteria bacterium	Creatinine	-0.690226	0.017289
s__Pelistega sp. MC2	Creatinine	-0.606015	0.037382
s__candidate division SR1 bacterium CG_4_9_14_3_um_filter_40_9	Creatinine	-0.601504	0.037382
s__uncultured bacterium (gcode 4)	Creatinine	-0.607519	0.037382
s__Peptostreptococcus sp. D1	Sarcosine	0.63609	0.0265141
s__Prevotella intermedia	Myo-inositol	-0.651128	0.0239826
s__candidate division SR1 bacterium CG_4_9_14_3_um_filter_40_9	Myo-inositol	-0.664662	0.0202007
s__candidate division SR1 bacterium RAAC1_SR1_1	Myo-inositol	-0.667669	0.0202007
s__uncultured bacterium (gcode 4)	Myo-inositol	-0.651128	0.0239826
s__Peptostreptococcus sp. D1	O-acetylsolasodine	-0.720301	0.00992678
s__Peptostreptococcus sp. D1	Ile-Tyr	0.603008	0.037382
s__Peptostreptococcus sp. D1	1-myristoyl-sn-glycero-3-phosphocholine	0.750376	0.00738195
s__Candidatus Gracilibacteria bacterium	Pro-hyp	-0.73985	0.00769641
s__uncultured bacterium (gcode 4)	Pro-hyp	-0.601504	0.037382
s__Peptostreptococcus sp. D1	Lpc 16:0	0.780451	0.00738195
s__Peptostreptococcus sp. D1	3-oxazolidinecarboxylic acid, 2,2-dimethyl-4-(1-oxo-2-hexadecyn-1-yl)-, 1,1-dimethylethyl ester, (4s)-	-0.682707	0.0181982
s__Peptostreptococcus sp. D1	1-palmitoyl-sn-glycero-3-phosphocholine	0.684211	0.0181982
s__Peptostreptococcus sp. D1	1,2-diamino-2-methylpropane	0.709774	0.0121557
s__Peptostreptococcus sp. D1	1-pentadecanoyl-sn-glycero-3-phosphocholine	0.634586	0.0265141
s__Prevotella intermedia	Heptadecasphinganine	0.61203	0.037382
s__Pelistega sp. MC2	Heptadecasphinganine	0.604511	0.037382
s__Prevotella intermedia	17,20-dimethylprostaglandin f1.alpha.	-0.637594	0.0265141
s__Peptostreptococcus sp. D1	17,20-dimethylprostaglandin f1.alpha.	-0.652632	0.0239826
s__Candidatus Gracilibacteria bacterium	3.alpha.,7.alpha.-dihydroxy-12-oxocholanoic acid	-0.646617	0.0244601
s__Peptostreptococcus sp. D1	Ile-Val	0.607519	0.037382

## Sheet: Table S22
Supplementary Table 22. Associations between significantly different gut microbes and lipids in Ad and Oa groups
Microbial species	Lipids	Correlation coefficients	Corrected P-values
s__Bacteroides fragilis	NEG307	-0.628571	0.0530963
s__Bacteroides plebeius CAG:211	NEG307	-0.669173	0.0503605
s__Enterococcus cecorum	NEG307	-0.73985	0.0387876
s__Bacteroides fragilis	NEG345	-0.663158	0.0504897
s__Bacteroides plebeius CAG:211	NEG345	-0.697744	0.0436806
s__Enterococcus cecorum	NEG345	-0.73985	0.0387876
s__Bacteroides fragilis	NEG374	-0.613534	0.0547322
s__Enterococcus cecorum	NEG374	-0.718797	0.0429239
s__Oscillibacter sp. CAG:155	NEG374	0.622556	0.0535712
s__Oscillibacter sp. PC13	NEG374	0.621053	0.0535712
s__Bacteroides fragilis	NEG381	-0.654135	0.0510064
s__Bacteroides plebeius CAG:211	NEG381	-0.693233	0.0436806
s__Enterococcus cecorum	NEG381	-0.757895	0.0370943
s__Bacteroides fragilis	NEG682	0.687218	0.0436806
s__Bacteroides plebeius CAG:211	NEG682	0.63609	0.0522891
s__Ruminococcus flavefaciens	NEG682	-0.637594	0.0522891
s__Akkermansia glycaniphila	NEG682	-0.642105	0.0522891
s__Bacteroides fragilis	NEG691	0.658647	0.0510064
s__Enterococcus cecorum	NEG691	0.621053	0.0535712
s__Oscillibacter sp. 57_20	NEG691	-0.615038	0.0540664
s__Ruminococcus albus	NEG691	-0.679699	0.046267
s__Ruminococcus sp. CAG:563	NEG691	-0.627068	0.0531491
s__Bacteroides fragilis	POS1255	-0.607519	0.0574729
s__Bacteroides plebeius CAG:211	POS1255	-0.669173	0.0503605
s__Enterococcus cecorum	POS1255	-0.753383	0.0370943
s__Enterococcus cecorum	POS13	-0.630075	0.0522891
s__Collinsella aerofaciens	POS1412	-0.750376	0.0370943
s__Cellulosilyticum ruminicola	POS1412	0.634586	0.0522891
s__Bacteroides plebeius CAG:211	POS1417	-0.630075	0.0522891
s__Enterococcus cecorum	POS1417	-0.771429	0.0328634
s__Bacteroides plebeius CAG:211	POS1584	-0.61203	0.0547322
s__Enterococcus cecorum	POS1584	-0.654135	0.0510064
s__Ruminococcus albus	POS191	-0.688722	0.0436806
s__Bacteroides fragilis	POS2061	0.645113	0.0522891
s__Bacteroides plebeius CAG:211	POS2061	0.735338	0.0387876
s__Enterococcus cecorum	POS2061	0.687218	0.0436806
s__Ruminococcus albus	POS2061	-0.625564	0.0535712
s__Fusobacterium mortiferum	POS2061	0.645113	0.0522891
s__Akkermansia glycaniphila	POS2061	-0.609023	0.056982
s__Bacteroides fragilis	POS2085	0.688722	0.0436806
s__Bacteroides plebeius CAG:211	POS2085	0.62406	0.0535712
s__Enterococcus cecorum	POS2085	0.711278	0.0436806
s__Oscillibacter sp. 1-3	POS2085	-0.625564	0.0535712
s__Oscillibacter sp. 57_20	POS2085	-0.643609	0.0522891
s__Oscillibacter sp. CAG:155	POS2085	-0.619549	0.0535712
s__Oscillibacter sp. PC13	POS2085	-0.606015	0.0574729
s__Ruminococcus albus	POS2085	-0.709774	0.0436806
s__Fusobacterium mortiferum	POS2085	0.634586	0.0522891
s__Bacteroides fragilis	POS2086	0.694737	0.0436806
s__Bacteroides plebeius CAG:211	POS2086	0.658647	0.0510064
s__Enterococcus cecorum	POS2086	0.694737	0.0436806
s__Oscillibacter sp. 1-3	POS2086	-0.633083	0.0522891
s__Oscillibacter sp. 57_20	POS2086	-0.64812	0.0522891
s__Oscillibacter sp. CAG:155	POS2086	-0.627068	0.0531491
s__Oscillibacter sp. PC13	POS2086	-0.607519	0.0574729
s__Ruminococcus albus	POS2086	-0.63609	0.0522891
s__Ruminococcus sp. CAG:563	POS2086	-0.618045	0.0537671
s__Fusobacterium mortiferum	POS2086	0.630075	0.0522891
s__Bacteroides fragilis	POS2104	0.616541	0.0537671
s__Bacteroides plebeius CAG:211	POS2104	0.604511	0.0574952
s__Enterococcus cecorum	POS2104	0.618045	0.0537671
s__Oscillibacter sp. 57_20	POS2104	-0.610526	0.055696
s__Ruminococcus albus	POS2104	-0.718797	0.0429239
s__Fusobacterium mortiferum	POS2104	0.630075	0.0522891
s__Enterococcus cecorum	POS212	0.613534	0.0547322
s__Akkermansia glycaniphila	POS212	-0.678195	0.0469133
s__Collinsella aerofaciens	POS2161	0.681203	0.046267
s__Bacteroides fragilis	POS2161	0.642105	0.0522891
s__Bacteroides plebeius CAG:211	POS2161	0.691729	0.0436806
s__Oscillibacter sp. 1-3	POS2161	-0.631579	0.0522891
s__Oscillibacter sp. 57_20	POS2161	-0.619549	0.0535712
s__Oscillibacter sp. CAG:155	POS2161	-0.616541	0.0537671
s__Fusobacterium mortiferum	POS2161	0.711278	0.0436806
s__Collinsella aerofaciens	POS2207	-0.685714	0.0443397
s__Collinsella aerofaciens	POS2249	-0.687218	0.0436806
s__Collinsella aerofaciens	POS2256	-0.732331	0.0387876
s__Bacteroides plebeius CAG:211	POS2256	-0.61203	0.0547322
s__Fusobacterium mortiferum	POS2256	-0.604511	0.0574952
s__Enterococcus cecorum	POS2408	0.603008	0.0574952
s__Ruminococcus albus	POS2408	-0.621053	0.0535712
s__Alistipes sp. CAG:831	POS2599	-0.604511	0.0574952
s__Ruminococcus albus	POS262	-0.688722	0.0436806
s__Enterococcus cecorum	POS2628	-0.691729	0.0436806
s__Bacteroides fragilis	POS2662	-0.627068	0.0531491
s__Bacteroides plebeius CAG:211	POS2662	-0.621053	0.0535712
s__Enterococcus cecorum	POS2662	-0.603008	0.0574952
s__Akkermansia glycaniphila	POS2662	0.627068	0.0531491
s__Bacteroides fragilis	POS2666	-0.619549	0.0535712
s__Bacteroides plebeius CAG:211	POS2666	-0.606015	0.0574729
s__Alistipes sp. CAG:831	POS2666	-0.667669	0.0504494
s__Ruminococcus albus	POS2666	0.61203	0.0547322
s__Alistipes sp. CAG:831	POS2668	-0.66015	0.0507858
s__Alistipes sp. CAG:831	POS2717	-0.637594	0.0522891
s__Bacteroides fragilis	POS2832	-0.723308	0.0419961
s__Bacteroides plebeius CAG:211	POS2832	-0.726316	0.0407958
s__Enterococcus cecorum	POS2832	-0.682707	0.0457229
s__Bacteroides fragilis	POS2835	-0.714286	0.0436806
s__Bacteroides plebeius CAG:211	POS2835	-0.666165	0.0504897
s__Enterococcus cecorum	POS2835	-0.708271	0.0436806
s__Oscillibacter sp. CAG:155	POS2835	0.603008	0.0574952
s__Bacteroides fragilis	POS2838	-0.637594	0.0522891
s__Bacteroides plebeius CAG:211	POS2838	-0.66015	0.0507858
s__Alistipes sp. CAG:831	POS2838	-0.616541	0.0537671
s__Enterococcus cecorum	POS2838	-0.661654	0.0504897
s__Ruminococcus albus	POS2838	0.666165	0.0504897
s__Bacteroides fragilis	POS2848	-0.64812	0.0522891
s__Bacteroides plebeius CAG:211	POS2848	-0.654135	0.0510064
s__Alistipes sp. CAG:831	POS2848	-0.657143	0.0510064
s__Enterococcus cecorum	POS2848	-0.615038	0.0540664
s__Ruminococcus albus	POS2848	0.673684	0.0469133
s__Alistipes sp. CAG:831	POS2916	-0.634586	0.0522891
s__Alistipes sp. CAG:831	POS2934	-0.64812	0.0522891
s__Enterococcus cecorum	POS2934	-0.604511	0.0574952
s__Oscillibacter sp. 57_20	POS2934	0.601504	0.0584369
s__Ruminococcus albus	POS2934	0.663158	0.0504897
s__Ruminococcus sp. CAG:563	POS2934	0.61203	0.0547322
s__Bacteroides fragilis	POS2975	-0.702256	0.0436806
s__Bacteroides plebeius CAG:211	POS2975	-0.675188	0.0469133
s__Enterococcus cecorum	POS2975	-0.735338	0.0387876
s__Oscillibacter sp. 1-3	POS2975	0.601504	0.0584369
s__Oscillibacter sp. CAG:155	POS2975	0.615038	0.0540664
s__Oscillibacter sp. PC13	POS2975	0.606015	0.0574729
s__Ruminococcus albus	POS2975	0.646617	0.0522891
s__Akkermansia glycaniphila	POS2975	0.606015	0.0574729
s__Ruminococcus sp. CAG:563	POS3054	0.625564	0.0535712
s__Ruminococcus sp. CAG:563	POS3055	0.654135	0.0510064
s__Alistipes sp. CAG:831	POS3068	-0.646617	0.0522891
s__Enterococcus cecorum	POS3068	-0.646617	0.0522891
s__Ruminococcus albus	POS3068	0.694737	0.0436806
s__Bacteroides fragilis	POS3139	-0.633083	0.0522891
s__Bacteroides plebeius CAG:211	POS3139	-0.630075	0.0522891
s__Enterococcus cecorum	POS3139	-0.645113	0.0522891
s__Butyricicoccus pullicaecorum	POS3139	0.61203	0.0547322
s__Oscillibacter sp. 1-3	POS3139	0.679699	0.046267
s__Oscillibacter sp. 57_20	POS3139	0.664662	0.0504897
s__Oscillibacter sp. CAG:155	POS3139	0.676692	0.0469133
s__Oscillibacter sp. PC13	POS3139	0.661654	0.0504897
s__Angelakisella massiliensis	POS3139	0.622556	0.0535712
s__Ruminococcus sp. CAG:563	POS3139	0.631579	0.0522891
s__Akkermansia glycaniphila	POS3139	0.619549	0.0535712
s__Bacteroides fragilis	POS3144	-0.633083	0.0522891
s__Bacteroides plebeius CAG:211	POS3144	-0.616541	0.0537671
s__Enterococcus cecorum	POS3144	-0.694737	0.0436806
s__Butyricicoccus pullicaecorum	POS3144	0.616541	0.0537671
s__Oscillibacter sp. 1-3	POS3144	0.663158	0.0504897
s__Oscillibacter sp. 57_20	POS3144	0.640602	0.0522891
s__Oscillibacter sp. CAG:155	POS3144	0.673684	0.0469133
s__Oscillibacter sp. PC13	POS3144	0.643609	0.0522891
s__Akkermansia glycaniphila	POS3144	0.618045	0.0537671
s__Enterococcus cecorum	POS3160	-0.652632	0.0514638
s__Bacteroides fragilis	POS3162	-0.673684	0.0469133
s__Bacteroides plebeius CAG:211	POS3162	-0.673684	0.0469133
s__Enterococcus cecorum	POS3162	-0.759398	0.0370943
s__Butyricicoccus pullicaecorum	POS3162	0.606015	0.0574729
s__Oscillibacter sp. 1-3	POS3162	0.639098	0.0522891
s__Oscillibacter sp. 57_20	POS3162	0.619549	0.0535712
s__Oscillibacter sp. CAG:155	POS3162	0.657143	0.0510064
s__Oscillibacter sp. PC13	POS3162	0.640602	0.0522891
s__Bacteroides fragilis	POS3206	-0.705263	0.0436806
s__Bacteroides plebeius CAG:211	POS3206	-0.62406	0.0535712
s__Enterococcus cecorum	POS3206	-0.684211	0.0450205
s__Oscillibacter sp. 1-3	POS3206	0.637594	0.0522891
s__Oscillibacter sp. 57_20	POS3206	0.652632	0.0514638
s__Oscillibacter sp. CAG:155	POS3206	0.637594	0.0522891
s__Oscillibacter sp. PC13	POS3206	0.637594	0.0522891
s__Ruminococcus albus	POS3206	0.778947	0.0328634
s__Ruminococcus sp. CAG:563	POS3206	0.622556	0.0535712
s__Ruminococcus albus	POS3209	0.62406	0.0535712
s__Ruminococcus sp. CAG:563	POS3209	0.642105	0.0522891
s__Bacteroides fragilis	POS3228	-0.655639	0.0510064
s__Bacteroides plebeius CAG:211	POS3228	-0.63609	0.0522891
s__Alistipes sp. CAG:831	POS3228	-0.607519	0.0574729
s__Enterococcus cecorum	POS3228	-0.687218	0.0436806
s__Oscillibacter sp. 1-3	POS3228	0.637594	0.0522891
s__Oscillibacter sp. 57_20	POS3228	0.62406	0.0535712
s__Oscillibacter sp. CAG:155	POS3228	0.639098	0.0522891
s__Oscillibacter sp. PC13	POS3228	0.628571	0.0530963
s__Ruminococcus albus	POS3228	0.63609	0.0522891
s__Ruminococcus albus	POS3434	-0.655639	0.0510064
s__Enterococcus cecorum	POS493	0.603008	0.0574952
s__Ruminococcus albus	POS493	-0.621053	0.0535712
s__Alistipes sp. CAG:831	POS697	-0.603008	0.0574952
s__Angelakisella massiliensis	POS697	0.634586	0.0522891
s__Ruminococcus sp. CAG:563	POS697	0.615038	0.0540664
s__Enterococcus cecorum	POS746	0.807519	0.020172
s__Oscillibacter sp. 1-3	POS746	-0.631579	0.0522891
s__Oscillibacter sp. 57_20	POS746	-0.603008	0.0574952
s__Oscillibacter sp. CAG:155	POS746	-0.667669	0.0504494
s__Oscillibacter sp. PC13	POS746	-0.604511	0.0574952
s__Ruminococcus albus	POS746	-0.616541	0.0537671
s__Fusobacterium mortiferum	POS746	0.621053	0.0535712
s__Escherichia coli	POS746	0.771429	0.0328634
s__Bacteroides plebeius CAG:211	POS1175	-0.651128	0.0522891
s__Prevotella sp. CAG:279	POS1175	0.61203	0.0547322
s__Enterococcus cecorum	POS1175	-0.691729	0.0436806
s__Desulfovibrio piger	POS1175	-0.610526	0.055696
s__Bacteroides fragilis	POS1348	-0.729323	0.0397237
s__Bacteroides plebeius	POS1348	-0.688722	0.0436806
s__Bacteroides plebeius CAG:211	POS1348	-0.846617	0.0060832
s__Enterococcus cecorum	POS1348	-0.733835	0.0387876
s__Fusobacterium mortiferum	POS1348	-0.699248	0.0436806
s__Oscillibacter sp. 1-3	POS2451	-0.661654	0.0504897
s__Oscillibacter sp. 57_20	POS2451	-0.640602	0.0522891
s__Oscillibacter sp. CAG:155	POS2451	-0.643609	0.0522891
s__Oscillibacter sp. PC13	POS2451	-0.642105	0.0522891
s__Ruminococcus sp. CAG:563	POS3041	0.606015	0.0574729
s__Desulfovibrio piger	POS3041	-0.630075	0.0522891

## Sheet: Table S23
Supplementary Table 23. Associations between significantly different gut microbes and lipids in Ma and Oa groups
Microbial species	Lipids	Correlation coefficients	Corrected P-values
s__Clostridium botulinum	NEG190	-0.610526	0.0408834
s__Clostridium butyricum	NEG190	-0.621053	0.0376267
s__Clostridium celatum	NEG190	-0.603008	0.0431024
s__Clostridium perfringens	NEG190	-0.717293	0.0250894
s__Clostridium sp. CAG:221	NEG190	-0.67218	0.0314012
s__Niameybacter massiliensis	NEG190	-0.634586	0.0347461
s__Firmicutes bacterium CAG:145	NEG190	-0.697744	0.0268917
s__Firmicutes bacterium CAG:238	NEG190	-0.663158	0.0314012
s__Firmicutes bacterium CAG:646	NEG190	0.615038	0.039462
s__Clostridium perfringens	NEG234	-0.657143	0.0314012
s__Clostridium sp. CAG:221	NEG234	-0.684211	0.0309517
s__Romboutsia ilealis	NEG234	-0.634586	0.0347461
s__Romboutsia timonensis	NEG234	-0.628571	0.0361359
s__Firmicutes bacterium CAG:145	NEG234	-0.679699	0.0314012
s__Firmicutes bacterium CAG:238	NEG234	-0.66015	0.0314012
s__Firmicutes bacterium CAG:646	NEG234	0.646617	0.0334096
s__Clostridium perfringens	NEG247	-0.619549	0.0384404
s__Clostridium sp. CAG:221	NEG247	-0.72782	0.0250894
s__Firmicutes bacterium CAG:145	NEG247	-0.64812	0.0334096
s__Firmicutes bacterium CAG:238	NEG247	-0.651128	0.0322267
s__Clostridium botulinum	NEG464	-0.625564	0.0376267
s__Clostridium butyricum	NEG464	-0.66015	0.0314012
s__Clostridium celatum	NEG464	-0.651128	0.0322267
s__Clostridium disporicum	NEG464	-0.633083	0.0348305
s__Clostridium perfringens	NEG464	-0.726316	0.0250894
s__Clostridium sp. CAG:221	NEG464	-0.703759	0.0267051
s__Clostridium sp. CAG:452	NEG464	-0.603008	0.0431024
s__Niameybacter massiliensis	NEG464	-0.661654	0.0314012
s__Romboutsia ilealis	NEG464	-0.604511	0.0424693
s__Romboutsia timonensis	NEG464	-0.601504	0.0431995
s__Clostridiales bacterium 42_27	NEG464	0.609023	0.0414746
s__Firmicutes bacterium CAG:145	NEG464	-0.712782	0.0250894
s__Firmicutes bacterium CAG:238	NEG464	-0.669173	0.0314012
s__Firmicutes bacterium CAG:646	NEG464	0.657143	0.0314012
s__Oscillibacter sp. CAG:241	NEG691	-0.621053	0.0376267
s__Firmicutes bacterium CAG:240	NEG691	-0.607519	0.0415118
s__Treponema brennaborense	NEG691	0.607519	0.0415118
s__Firmicutes bacterium CAG:145	POS1156	-0.621053	0.0376267
s__Firmicutes bacterium CAG:238	POS1156	-0.601504	0.0431995
s__Clostridium sp. CAG:221	POS1165	-0.652632	0.0322267
s__Romboutsia ilealis	POS1165	-0.634586	0.0347461
s__Romboutsia timonensis	POS1165	-0.633083	0.0348305
s__Firmicutes bacterium CAG:145	POS1165	-0.615038	0.039462
s__Firmicutes bacterium CAG:238	POS1165	-0.622556	0.0376267
s__Firmicutes bacterium CAG:646	POS1165	0.651128	0.0322267
s__Clostridium botulinum	POS1507	-0.639098	0.0347461
s__Clostridium butyricum	POS1507	-0.664662	0.0314012
s__Clostridium celatum	POS1507	-0.645113	0.0336992
s__Clostridium disporicum	POS1507	-0.622556	0.0376267
s__Clostridium perfringens	POS1507	-0.721805	0.0250894
s__Clostridium sp. CAG:221	POS1507	-0.712782	0.0250894
s__Clostridium sp. CAG:452	POS1507	-0.640602	0.0347461
s__Niameybacter massiliensis	POS1507	-0.66015	0.0314012
s__Romboutsia ilealis	POS1507	-0.613534	0.040021
s__Romboutsia timonensis	POS1507	-0.610526	0.0408834
s__Firmicutes bacterium CAG:145	POS1507	-0.744361	0.0250894
s__Firmicutes bacterium CAG:238	POS1507	-0.712782	0.0250894
s__Firmicutes bacterium CAG:646	POS1507	0.658647	0.0314012
s__Clostridium botulinum	POS1745	-0.627068	0.036912
s__Clostridium butyricum	POS1745	-0.640602	0.0347461
s__Clostridium perfringens	POS1745	-0.631579	0.0352542
s__Clostridium sp. CAG:221	POS1745	-0.700752	0.0267051
s__Firmicutes bacterium CAG:145	POS1745	-0.735338	0.0250894
s__Firmicutes bacterium CAG:238	POS1745	-0.780451	0.0250894
s__Firmicutes bacterium CAG:646	POS1745	0.685714	0.0309517
s__Treponema brennaborense	POS2085	0.667669	0.0314012
s__Clostridiales bacterium 42_27	POS2156	0.637594	0.0347461
s__Actinomyces radicidentis	POS248	-0.62406	0.0376267
s__Butyricicoccus pullicaecorum	POS248	0.634586	0.0347461
s__Clostridium perfringens	POS248	-0.709774	0.0250894
s__Faecalibacterium prausnitzii	POS248	0.621053	0.0376267
s__Clostridiales bacterium 42_27	POS248	0.67218	0.0314012
s__Clostridium celatum	POS3214	-0.615038	0.039462
s__Clostridium perfringens	POS3214	-0.657143	0.0314012
s__Hungatella hathewayi	POS3214	0.615038	0.039462
s__uncultured Blautia sp.	POS3214	0.610526	0.0408834
s__Clostridiales bacterium 42_27	POS3214	0.699248	0.0267051
s__Clostridiales bacterium 59_14	POS3214	0.66015	0.0314012
s__Clostridiales bacterium NK3B98	POS3214	0.661654	0.0314012
s__Erysipelotrichaceae bacterium NK3D112	POS3214	0.642105	0.0347461
s__Butyricicoccus pullicaecorum	POS3458	0.630075	0.0356894
s__Butyricicoccus pullicaecorum	POS3465	0.604511	0.0424693
s__Clostridium botulinum	POS3465	-0.639098	0.0347461
s__Clostridium butyricum	POS3465	-0.651128	0.0322267
s__Clostridium celatum	POS3465	-0.652632	0.0322267
s__Clostridium disporicum	POS3465	-0.630075	0.0356894
s__Clostridium perfringens	POS3465	-0.732331	0.0250894
s__Clostridium sp. CAG:221	POS3465	-0.684211	0.0309517
s__Clostridium sp. CAG:452	POS3465	-0.609023	0.0414746
s__Niameybacter massiliensis	POS3465	-0.649624	0.0328768
s__Romboutsia ilealis	POS3465	-0.62406	0.0376267
s__Romboutsia timonensis	POS3465	-0.621053	0.0376267
s__Firmicutes bacterium CAG:145	POS3465	-0.730827	0.0250894
s__Firmicutes bacterium CAG:238	POS3465	-0.709774	0.0250894
s__Firmicutes bacterium CAG:646	POS3465	0.667669	0.0314012
s__Clostridium butyricum	NEG390	-0.628571	0.0361359
s__Clostridium celatum	NEG390	-0.651128	0.0322267
s__Clostridium disporicum	NEG390	-0.631579	0.0352542
s__Clostridium perfringens	NEG390	-0.73985	0.0250894
s__Clostridium sp. CAG:221	NEG390	-0.658647	0.0314012
s__Niameybacter massiliensis	NEG390	-0.639098	0.0347461
s__Romboutsia ilealis	NEG390	-0.646617	0.0334096
s__Romboutsia timonensis	NEG390	-0.645113	0.0336992
s__Clostridiales bacterium 42_27	NEG390	0.63609	0.0347461
s__Clostridiales bacterium NK3B98	NEG390	0.601504	0.0431995
s__Firmicutes bacterium CAG:145	NEG390	-0.720301	0.0250894
s__Firmicutes bacterium CAG:238	NEG390	-0.646617	0.0334096
s__Firmicutes bacterium CAG:646	NEG390	0.613534	0.040021
s__Clostridium butyricum	NEG426	-0.61203	0.0408828
s__Clostridium perfringens	NEG426	-0.607519	0.0415118
s__Clostridium sp. CAG:221	NEG426	-0.691729	0.0286398
s__Firmicutes bacterium CAG:145	NEG426	-0.699248	0.0267051
s__Firmicutes bacterium CAG:238	NEG426	-0.622556	0.0376267
s__Clostridium botulinum	NEG432	-0.618045	0.0389664
s__Clostridium butyricum	NEG432	-0.663158	0.0314012
s__Clostridium celatum	NEG432	-0.634586	0.0347461
s__Clostridium disporicum	NEG432	-0.618045	0.0389664
s__Clostridium perfringens	NEG432	-0.702256	0.0267051
s__Clostridium sp. CAG:221	NEG432	-0.73985	0.0250894
s__Niameybacter massiliensis	NEG432	-0.634586	0.0347461
s__Firmicutes bacterium CAG:145	NEG432	-0.724812	0.0250894
s__Firmicutes bacterium CAG:238	NEG432	-0.691729	0.0286398
s__Butyricicoccus pullicaecorum	POS1626	0.663158	0.0314012
s__Clostridium botulinum	POS1626	-0.681203	0.0314012
s__Clostridium butyricum	POS1626	-0.709774	0.0250894
s__Clostridium celatum	POS1626	-0.658647	0.0314012
s__Clostridium disporicum	POS1626	-0.610526	0.0408834
s__Clostridium perfringens	POS1626	-0.717293	0.0250894
s__Clostridium sp. CAG:221	POS1626	-0.67218	0.0314012
s__Clostridium sp. CAG:452	POS1626	-0.642105	0.0347461
s__Niameybacter massiliensis	POS1626	-0.657143	0.0314012
s__Romboutsia ilealis	POS1626	-0.63609	0.0347461
s__Romboutsia timonensis	POS1626	-0.634586	0.0347461
s__Clostridiales bacterium 42_27	POS1626	0.62406	0.0376267
s__Firmicutes bacterium CAG:145	POS1626	-0.72782	0.0250894
s__Firmicutes bacterium CAG:238	POS1626	-0.700752	0.0267051
s__Firmicutes bacterium CAG:646	POS1626	0.664662	0.0314012
s__Niameybacter massiliensis	POS2655	-0.606015	0.0418468
s__Bifidobacterium pseudolongum	POS3001	-0.63609	0.0347461
s__Prevotella sp. CAG:279	POS3001	0.667669	0.0314012
s__Prevotella sp. P2-180	POS3001	0.690226	0.0289111
s__Prevotella sp. P5-92	POS3001	0.670677	0.0314012
s__Butyricicoccus pullicaecorum	POS3001	0.633083	0.0348305
s__Clostridium botulinum	POS3001	-0.67218	0.0314012
s__Clostridium butyricum	POS3001	-0.67218	0.0314012
s__Clostridium celatum	POS3001	-0.72782	0.0250894
s__Clostridium disporicum	POS3001	-0.691729	0.0286398
s__Clostridium perfringens	POS3001	-0.730827	0.0250894
s__Clostridium sp. CAG:452	POS3001	-0.616541	0.039462
s__Clostridium sp. Marseille-P299	POS3001	-0.676692	0.0314012
s__uncultured Blautia sp.	POS3001	0.616541	0.039462
s__Lachnoclostridium phytofermentans	POS3001	-0.669173	0.0314012
s__Niameybacter massiliensis	POS3001	-0.76391	0.0250894
s__Clostridiales bacterium 42_27	POS3001	0.606015	0.0418468
s__Clostridiales bacterium 59_14	POS3001	0.669173	0.0314012
s__Holdemanella biformis	POS3001	0.76391	0.0250894
s__Firmicutes bacterium CAG:145	POS3001	-0.651128	0.0322267
s__Firmicutes bacterium CAG:238	POS3001	-0.607519	0.0415118
s__Firmicutes bacterium CAG:240	POS3001	0.601504	0.0431995
s__Firmicutes bacterium CAG:24053_14	POS3001	0.606015	0.0418468

## Sheet: Table S24
Supplementary Table 24. Associations between significantly different salivary microbes and lipids in Ad and Oa groups
Microbial species	Lipids	Correlation coefficients	Corrected P-values
s__Staphylococcus sciuri	NEG307	0.643609	0.0765795
s__Streptococcus orisratti	NEG307	0.62406	0.0808833
s__Escherichia coli	NEG307	0.658647	0.0760518
s__Actinobacillus minor	NEG307	0.603008	0.0819653
s__Actinobacillus seminis	NEG307	0.670677	0.0713399
s__Moraxella pluranimalium	NEG307	0.778947	0.0300675
s__Staphylococcus sciuri	NEG345	0.681203	0.0711775
s__Streptococcus orisratti	NEG345	0.669173	0.0719436
s__Escherichia coli	NEG345	0.709774	0.0650233
s__Actinobacillus seminis	NEG345	0.705263	0.0688954
s__Moraxella pluranimalium	NEG345	0.778947	0.0300675
s__Streptococcus orisratti	NEG374	0.615038	0.0819653
s__Moraxella pluranimalium	NEG374	0.625564	0.079405
s__Staphylococcus sciuri	NEG381	0.634586	0.079405
s__Streptococcus orisratti	NEG381	0.628571	0.079405
s__Escherichia coli	NEG381	0.657143	0.0760518
s__Actinobacillus seminis	NEG381	0.658647	0.0760518
s__Moraxella pluranimalium	NEG381	0.77594	0.0300675
s__Corynebacterium pollutisoli	NEG682	-0.616541	0.0819653
s__Capnocytophaga canimorsus	NEG682	0.601504	0.0819653
s__Staphylococcus sciuri	NEG682	-0.633083	0.079405
s__Globicatella sulfidifaciens	NEG682	-0.649624	0.0760518
s__Escherichia coli	NEG682	-0.760902	0.0309431
s__Anaerolineaceae bacterium oral taxon 439	NEG691	-0.613534	0.0819653
s__Staphylococcus sciuri	NEG691	-0.628571	0.079405
s__Escherichia coli	NEG691	-0.622556	0.0814867
s__Actinobacillus seminis	NEG691	-0.625564	0.079405
s__Actinobacillus minor	NEG723	-0.651128	0.0760518
s__Actinobacillus seminis	NEG723	-0.646617	0.0760518
s__Staphylococcus sciuri	POS1255	0.621053	0.0815073
s__Actinobacillus minor	POS1255	0.64812	0.0760518
s__Actinobacillus seminis	POS1255	0.688722	0.0705321
s__Moraxella pluranimalium	POS1255	0.765414	0.0300943
s__Actinobacillus minor	POS13	0.627068	0.079405
s__Actinobacillus seminis	POS13	0.642105	0.0766214
s__Moraxella pluranimalium	POS13	0.793985	0.0300675
s__Petrimonas sp. IBARAKI	POS1412	0.622556	0.0814867
s__Staphylococcus sciuri	POS1412	0.720301	0.0558864
s__Escherichia coli	POS1412	0.687218	0.0705321
s__Actinobacillus seminis	POS1417	0.607519	0.0819653
s__Moraxella pluranimalium	POS1417	0.757895	0.031933
s__Actinobacillus seminis	POS1584	0.619549	0.0815073
s__Moraxella pluranimalium	POS1584	0.771429	0.0300943
s__Cruoricaptor ignavus	POS191	0.619549	0.0815073
s__Flavobacterium marinum	POS191	0.610526	0.0819653
s__Anaerolineaceae bacterium oral taxon 439	POS191	-0.606015	0.0819653
s__Staphylococcus sciuri	POS2061	-0.690226	0.0705321
s__Helcococcus kunzii	POS2061	-0.649624	0.0760518
s__Helcococcus sueciensis	POS2061	-0.670677	0.0713399
s__Escherichia coli	POS2061	-0.684211	0.0705321
s__Actinobacillus seminis	POS2061	-0.613534	0.0819653
s__Moraxella pluranimalium	POS2061	-0.690226	0.0705321
s__Chryseobacterium chaponense	POS2085	0.610526	0.0819653
s__Chryseobacterium hominis	POS2085	0.607519	0.0819653
s__Cruoricaptor ignavus	POS2085	0.601504	0.0819653
s__Flavobacterium marinum	POS2085	0.609023	0.0819653
s__Anaerolineaceae bacterium oral taxon 439	POS2085	-0.610526	0.0819653
s__Staphylococcus sciuri	POS2085	-0.699248	0.0705321
s__Escherichia coli	POS2085	-0.670677	0.0713399
s__Actinobacillus seminis	POS2085	-0.64812	0.0760518
s__Petrimonas sp. IBARAKI	POS2086	-0.655639	0.0760518
s__Chryseobacterium chaponense	POS2086	0.630075	0.079405
s__Chryseobacterium haifense	POS2086	0.604511	0.0819653
s__Chryseobacterium hominis	POS2086	0.633083	0.079405
s__Cruoricaptor ignavus	POS2086	0.619549	0.0815073
s__Flavobacterium marinum	POS2086	0.627068	0.079405
s__Anaerolineaceae bacterium oral taxon 439	POS2086	-0.699248	0.0705321
s__Staphylococcus sciuri	POS2086	-0.690226	0.0705321
s__Peptostreptococcus sp. D1	POS2086	-0.625564	0.079405
s__Escherichia coli	POS2086	-0.658647	0.0760518
s__Actinobacillus seminis	POS2086	-0.690226	0.0705321
s__Corynebacterium pollutisoli	POS2104	-0.625564	0.079405
s__Brachybacterium muris	POS2104	-0.633083	0.079405
s__Chryseobacterium chaponense	POS2104	0.61203	0.0819653
s__Chryseobacterium hominis	POS2104	0.61203	0.0819653
s__Staphylococcus sciuri	POS2104	-0.777444	0.0300675
s__Globicatella sulfidifaciens	POS2104	-0.669173	0.0719436
s__Streptococcus orisratti	POS2104	-0.606015	0.0819653
s__Escherichia coli	POS2104	-0.753383	0.0347161
s__Actinobacillus seminis	POS2104	-0.633083	0.079405
s__Corynebacterium matruchotii	POS2120	-0.664662	0.0748933
s__Corynebacterium mustelae	POS2120	-0.649624	0.0760518
s__Petrimonas sp. IBARAKI	POS2120	-0.63609	0.079405
s__Prevotella intermedia	POS2120	-0.630075	0.079405
s__Prevotella saccharolytica	POS2120	-0.625564	0.079405
s__Prevotella sp. HUN102	POS2120	-0.639098	0.0768785
s__Chryseobacterium antarcticum	POS2120	0.607519	0.0819653
s__Chryseobacterium bovis	POS2120	0.664662	0.0748933
s__Chryseobacterium chaponense	POS2120	0.708271	0.0655859
s__Chryseobacterium haifense	POS2120	0.685714	0.0705321
s__Chryseobacterium hominis	POS2120	0.735338	0.0513317
s__Chryseobacterium indologenes	POS2120	0.675188	0.0713399
s__Chryseobacterium jeonii	POS2120	0.622556	0.0814867
s__Chryseobacterium koreense	POS2120	0.64812	0.0760518
s__Chryseobacterium sp. 39-10	POS2120	0.675188	0.0713399
s__Chryseobacterium sp. FF12	POS2120	0.637594	0.0787383
s__Chryseobacterium sp. FH1	POS2120	0.678195	0.0711775
s__Chryseobacterium sp. SCN 40-13	POS2120	0.601504	0.0819653
s__Chryseobacterium taklimakanense	POS2120	0.645113	0.0765795
s__Cloacibacterium normanense	POS2120	0.642105	0.0766214
s__Cruoricaptor ignavus	POS2120	0.661654	0.0760518
s__Elizabethkingia anophelis	POS2120	0.625564	0.079405
s__Flavobacterium marinum	POS2120	0.613534	0.0819653
s__Flavobacterium ummariense	POS2120	0.697744	0.0705321
s__Soonwooa buanensis	POS2120	0.625564	0.079405
s__Flavobacteriaceae bacterium 3519-10	POS2120	0.679699	0.0711775
s__Flavobacteriaceae bacterium JJC	POS2120	0.628571	0.079405
s__Anaerolineaceae bacterium oral taxon 439	POS2120	-0.675188	0.0713399
s__Streptococcus orisratti	POS2120	-0.652632	0.0760518
s__Peptostreptococcus sp. D1	POS2120	-0.62406	0.0808833
s__Chryseobacterium hominis	POS2159	0.615038	0.0819653
s__Cruoricaptor ignavus	POS2159	0.609023	0.0819653
s__Flavobacterium columnare	POS2159	0.604511	0.0819653
s__Flavobacterium marinum	POS2159	0.613534	0.0819653
s__Porphyromonadaceae bacterium H1	POS2160	-0.601504	0.0819653
s__Tannerella forsythia	POS2160	-0.621053	0.0815073
s__Chryseobacterium bovis	POS2160	0.613534	0.0819653
s__Chryseobacterium chaponense	POS2160	0.646617	0.0760518
s__Chryseobacterium haifense	POS2160	0.634586	0.079405
s__Chryseobacterium hominis	POS2160	0.678195	0.0711775
s__Chryseobacterium koreense	POS2160	0.609023	0.0819653
s__Chryseobacterium sp. 39-10	POS2160	0.609023	0.0819653
s__Chryseobacterium sp. FF12	POS2160	0.618045	0.0819653
s__Chryseobacterium sp. FH1	POS2160	0.663158	0.0760518
s__Chryseobacterium sp. VAUSW3	POS2160	0.616541	0.0819653
s__Flavobacteriaceae bacterium 3519-10	POS2160	0.604511	0.0819653
s__Petrimonas sp. IBARAKI	POS2161	-0.694737	0.0705321
s__Tannerella forsythia	POS2161	-0.64812	0.0760518
s__Chryseobacterium bovis	POS2161	0.646617	0.0760518
s__Chryseobacterium chaponense	POS2161	0.678195	0.0711775
s__Chryseobacterium haifense	POS2161	0.643609	0.0765795
s__Chryseobacterium hominis	POS2161	0.694737	0.0705321
s__Chryseobacterium koreense	POS2161	0.619549	0.0815073
s__Chryseobacterium sp. 39-10	POS2161	0.646617	0.0760518
s__Chryseobacterium sp. FF12	POS2161	0.601504	0.0819653
s__Chryseobacterium sp. FH1	POS2161	0.652632	0.0760518
s__Chryseobacterium taklimakanense	POS2161	0.625564	0.079405
s__Cruoricaptor ignavus	POS2161	0.642105	0.0766214
s__Elizabethkingia anophelis	POS2161	0.61203	0.0819653
s__Flavobacterium marinum	POS2161	0.633083	0.079405
s__Flavobacterium ummariense	POS2161	0.616541	0.0819653
s__Soonwooa buanensis	POS2161	0.607519	0.0819653
s__Flavobacteriaceae bacterium 3519-10	POS2161	0.631579	0.079405
s__Anaerolineaceae bacterium oral taxon 439	POS2161	-0.730827	0.0554348
s__Staphylococcus sciuri	POS2161	-0.714286	0.0614891
s__Streptococcus orisratti	POS2161	-0.690226	0.0705321
s__Escherichia coli	POS2161	-0.667669	0.0735182
s__Actinobacillus seminis	POS2161	-0.649624	0.0760518
s__Staphylococcus sciuri	POS2207	0.66015	0.0760518
s__Peptostreptococcus sp. D1	POS2207	0.610526	0.0819653
s__Escherichia coli	POS2207	0.693233	0.0705321
s__Actinobacillus seminis	POS2207	0.639098	0.0768785
s__Staphylococcus sciuri	POS2249	0.685714	0.0705321
s__Globicatella sulfidifaciens	POS2249	0.607519	0.0819653
s__Escherichia coli	POS2249	0.643609	0.0765795
s__Actinobacillus seminis	POS2249	0.61203	0.0819653
s__Corynebacterium pollutisoli	POS2256	0.766917	0.0300943
s__Corynebacterium sp. Marseille-P4122	POS2256	0.774436	0.0300675
s__Corynebacterium xerosis	POS2256	0.723308	0.0554348
s__Brachybacterium muris	POS2256	0.673684	0.0713399
s__Kocuria sp. WRN011	POS2256	0.627068	0.079405
s__Kocuria sp. ZOR0020	POS2256	0.631579	0.079405
s__Staphylococcus sciuri	POS2256	0.815038	0.026607
s__Globicatella sulfidifaciens	POS2256	0.745865	0.0392335
s__Helcococcus kunzii	POS2256	0.634586	0.079405
s__Escherichia coli	POS2256	0.830075	0.0263003
s__Actinobacillus seminis	POS2256	0.651128	0.0760518
s__Cruoricaptor ignavus	POS248	0.610526	0.0819653
s__Flavobacterium columnare	POS248	0.639098	0.0768785
s__Flavobacterium marinum	POS248	0.690226	0.0705321
s__Riemerella columbipharyngis	POS248	0.604511	0.0819653
s__Cruoricaptor ignavus	POS262	0.619549	0.0815073
s__Flavobacterium marinum	POS262	0.610526	0.0819653
s__Anaerolineaceae bacterium oral taxon 439	POS262	-0.606015	0.0819653
s__Flavobacterium ummariense	POS2628	-0.640602	0.0767224
s__Chlamydia trachomatis	POS2628	0.607519	0.0819653
s__Brachymonas chironomi	POS2628	-0.711278	0.0645168
s__Brachymonas denitrificans	POS2628	-0.646617	0.0760518
s__Helcococcus sueciensis	POS2662	0.643609	0.0765795
s__Moraxella pluranimalium	POS2662	0.678195	0.0711775
s__Staphylococcus sciuri	POS2666	0.643609	0.0765795
s__Escherichia coli	POS2666	0.691729	0.0705321
s__Moraxella pluranimalium	POS2666	0.603008	0.0819653
s__Moraxella pluranimalium	POS2668	0.616541	0.0819653
s__Escherichia coli	POS2717	0.601504	0.0819653
s__Staphylococcus sciuri	POS2832	0.621053	0.0815073
s__Helcococcus sueciensis	POS2832	0.63609	0.079405
s__Escherichia coli	POS2832	0.601504	0.0819653
s__Actinobacillus minor	POS2832	0.645113	0.0765795
s__Actinobacillus seminis	POS2832	0.619549	0.0815073
s__Moraxella pluranimalium	POS2832	0.721805	0.0556264
s__candidate division SR1 bacterium Aalborg_AAW-1	POS2832	-0.610526	0.0819653
s__Kocuria sp. ZOR0020	POS2835	0.610526	0.0819653
s__Staphylococcus sciuri	POS2835	0.640602	0.0767224
s__Escherichia coli	POS2835	0.628571	0.079405
s__Actinobacillus minor	POS2835	0.633083	0.079405
s__Actinobacillus seminis	POS2835	0.642105	0.0766214
s__Moraxella pluranimalium	POS2835	0.726316	0.0554348
s__Staphylococcus sciuri	POS2838	0.666165	0.0748933
s__Escherichia coli	POS2838	0.664662	0.0748933
s__Moraxella pluranimalium	POS2838	0.615038	0.0819653
s__Staphylococcus sciuri	POS2848	0.64812	0.0760518
s__Escherichia coli	POS2848	0.679699	0.0711775
s__Moraxella pluranimalium	POS2916	0.606015	0.0819653
s__Staphylococcus sciuri	POS2934	0.640602	0.0767224
s__Streptococcus orisratti	POS2934	0.607519	0.0819653
s__Escherichia coli	POS2934	0.64812	0.0760518
s__Kocuria sp. ZOR0020	POS2975	0.61203	0.0819653
s__Staphylococcus sciuri	POS2975	0.67218	0.0713399
s__Helcococcus sueciensis	POS2975	0.603008	0.0819653
s__Escherichia coli	POS2975	0.630075	0.079405
s__Actinobacillus seminis	POS2975	0.61203	0.0819653
s__Moraxella pluranimalium	POS2975	0.723308	0.0554348
s__Staphylococcus sciuri	POS3068	0.625564	0.079405
s__Escherichia coli	POS3068	0.646617	0.0760518
s__Kocuria sp. ZOR0020	POS3139	0.618045	0.0819653
s__Petrimonas sp. IBARAKI	POS3139	0.658647	0.0760518
s__Anaerolineaceae bacterium oral taxon 439	POS3139	0.64812	0.0760518
s__Staphylococcus sciuri	POS3139	0.729323	0.0554348
s__Streptococcus orisratti	POS3139	0.679699	0.0711775
s__Escherichia coli	POS3139	0.747368	0.0392335
s__Moraxella pluranimalium	POS3139	0.601504	0.0819653
s__Kocuria sp. ZOR0020	POS3144	0.604511	0.0819653
s__Petrimonas sp. IBARAKI	POS3144	0.601504	0.0819653
s__Chlamydia trachomatis	POS3144	0.601504	0.0819653
s__Staphylococcus sciuri	POS3144	0.684211	0.0705321
s__Streptococcus orisratti	POS3144	0.685714	0.0705321
s__Peptostreptococcus sp. D1	POS3144	0.607519	0.0819653
s__Escherichia coli	POS3144	0.655639	0.0760518
s__Actinobacillus seminis	POS3144	0.618045	0.0819653
s__Moraxella pluranimalium	POS3144	0.687218	0.0705321
s__Actinobacillus minor	POS3160	0.640602	0.0767224
s__Moraxella pluranimalium	POS3160	0.654135	0.0760518
s__Kocuria sp. ZOR0020	POS3162	0.661654	0.0760518
s__Staphylococcus sciuri	POS3162	0.673684	0.0713399
s__Streptococcus orisratti	POS3162	0.604511	0.0819653
s__Actinobacillus seminis	POS3162	0.601504	0.0819653
s__Moraxella pluranimalium	POS3162	0.76391	0.0300943
s__Staphylococcus sciuri	POS3206	0.622556	0.0814867
s__Actinobacillus seminis	POS3206	0.625564	0.079405
s__Petrimonas sp. IBARAKI	POS3209	0.619549	0.0815073
s__Anaerolineaceae bacterium oral taxon 439	POS3209	0.607519	0.0819653
s__Kocuria sp. ZOR0020	POS3228	0.616541	0.0819653
s__Petrimonas sp. IBARAKI	POS3228	0.64812	0.0760518
s__Anaerolineaceae bacterium oral taxon 439	POS3228	0.625564	0.079405
s__Staphylococcus sciuri	POS3228	0.714286	0.0614891
s__Streptococcus orisratti	POS3228	0.634586	0.079405
s__Escherichia coli	POS3228	0.723308	0.0554348
s__Moraxella pluranimalium	POS3228	0.619549	0.0815073
s__Escherichia coli	POS697	0.613534	0.0819653
s__Kocuria sp. ZOR0020	POS746	-0.607519	0.0819653
s__Chlamydia trachomatis	POS746	-0.670677	0.0713399
s__Staphylococcus sciuri	POS746	-0.774436	0.0300675
s__Moraxella pluranimalium	POS1175	0.676692	0.0713399
s__Staphylococcus sciuri	POS1348	0.652632	0.0760518
s__Escherichia coli	POS1348	0.616541	0.0819653
s__Actinobacillus seminis	POS1348	0.657143	0.0760518
s__Moraxella pluranimalium	POS1348	0.603008	0.0819653
s__Petrimonas sp. IBARAKI	POS2124	-0.631579	0.079405
s__Chryseobacterium chaponense	POS2124	0.613534	0.0819653
s__Chryseobacterium haifense	POS2124	0.604511	0.0819653
s__Chryseobacterium hominis	POS2124	0.630075	0.079405
s__Chryseobacterium taklimakanense	POS2124	0.603008	0.0819653
s__Cruoricaptor ignavus	POS2124	0.606015	0.0819653
s__Flavobacterium marinum	POS2124	0.670677	0.0713399
s__Anaerolineaceae bacterium oral taxon 439	POS2124	-0.651128	0.0760518
s__Staphylococcus sciuri	POS2124	-0.604511	0.0819653
s__Streptococcus orisratti	POS2124	-0.618045	0.0819653
s__Peptostreptococcus sp. D1	POS2124	-0.639098	0.0768785
s__Streptococcus orisratti	POS2451	-0.702256	0.0705321
s__Moraxella pluranimalium	POS3041	0.646617	0.0760518

## Sheet: Table S25
Supplementary Table 25. Associations between significantly different salivary microbes and lipids in Ma and Oa groups
Microbial species	Lipids	Correlation coefficients	Corrected P-values
s__Prevotella intermedia	NEG190	0.696241	0.0103988
s__Peptostreptococcus sp. D1	NEG190	0.781955	0.00251594
s__candidate division SR1 bacterium CG_4_9_14_3_um_filter_40_9	NEG190	0.62406	0.0295296
s__candidate division SR1 bacterium RAAC1_SR1_1	NEG190	0.630075	0.0286026
s__uncultured bacterium (gcode 4)	NEG190	0.643609	0.0244799
s__Peptostreptococcus sp. D1	NEG234	0.675188	0.0146721
s__Prevotella intermedia	NEG247	0.621053	0.0295296
s__Peptostreptococcus sp. D1	NEG247	0.619549	0.0295296
s__candidate division SR1 bacterium CG_4_9_14_3_um_filter_40_9	NEG247	0.615038	0.0302071
s__candidate division SR1 bacterium RAAC1_SR1_1	NEG247	0.613534	0.0302071
s__uncultured bacterium (gcode 4)	NEG247	0.631579	0.0286026
s__Prevotella intermedia	NEG464	0.681203	0.0134197
s__Peptostreptococcus sp. D1	NEG464	0.756391	0.00416336
s__Peptostreptococcus sp. D1	POS1156	0.706767	0.00843169
s__Peptostreptococcus sp. D1	POS1507	0.780451	0.00251594
s__uncultured bacterium (gcode 4)	POS1507	0.604511	0.0311998
s__Candidatus Gracilibacteria bacterium	POS1745	0.649624	0.0225202
s__Peptostreptococcus sp. D1	POS1745	0.670677	0.0152716
s__candidate division SR1 bacterium CG_4_9_14_3_um_filter_40_9	POS1745	0.606015	0.0311998
s__candidate division SR1 bacterium RAAC1_SR1_1	POS1745	0.604511	0.0311998
s__uncultured bacterium (gcode 4)	POS1745	0.627068	0.0292498
s__Peptostreptococcus sp. D1	POS3214	0.615038	0.0302071
s__Peptostreptococcus sp. D1	POS3458	0.61203	0.0302071
s__Peptostreptococcus sp. D1	POS3465	0.781955	0.00251594
s__uncultured bacterium (gcode 4)	POS3465	0.606015	0.0311998
s__Peptostreptococcus sp. D1	NEG340	0.690226	0.0113904
s__Prevotella intermedia	NEG390	0.726316	0.00697741
s__Peptostreptococcus sp. D1	NEG390	0.789474	0.00251594
s__Prevotella intermedia	NEG426	0.669173	0.0152716
s__Peptostreptococcus sp. D1	NEG426	0.711278	0.00800363
s__Prevotella intermedia	NEG432	0.809023	0.00251594
s__Peptostreptococcus sp. D1	NEG432	0.736842	0.00674585
s__candidate division SR1 bacterium CG_4_9_14_3_um_filter_40_9	NEG432	0.721805	0.00697741
s__candidate division SR1 bacterium RAAC1_SR1_1	NEG432	0.721805	0.00697741
s__uncultured bacterium (gcode 4)	NEG432	0.72782	0.00697741
s__Peptostreptococcus sp. D1	POS1274	0.621053	0.0295296
s__Peptostreptococcus sp. D1	POS1380	0.601504	0.0313644
s__Peptostreptococcus sp. D1	POS1626	0.714286	0.00794097
s__Peptostreptococcus sp. D1	POS1675	-0.603008	0.0312743
s__Peptostreptococcus sp. D1	POS2655	0.637594	0.0265903
s__Peptostreptococcus sp. D1	POS3001	0.760902	0.00416336
